CcGRXS12 protects plants from biotic and abiotic stresses

1                    ***Capsicum chinense* Jacq. derived glutaredoxin (*CcGRXS12*) alters**  
2                    **phytohormonal pathways and redox status of the cells to confer resistance**  
3                    **against pepper mild mottle virus (PMMoV-I)**

4                    R. M. Saravana Kumar <sup>1,2</sup>, S.V.Ramesh <sup>3</sup>, Z. Sun <sup>5</sup>, Sugitha Thankappan <sup>4</sup>, Asish  
5                    Kanakaraj Binodh <sup>6</sup>

6                    <sup>1</sup> Department of Microbial and Plant Biotechnology, Centro de Investigaciones  
7                    Biológicas Margarita Salas-CSIC, Madrid, Spain.

8                    <sup>2</sup> Department of Biotechnology, Saveetha School of Engineering, Saveetha  
9                    University, Chennai, Tamil Nadu, 602105, India. (saravanakumarm.sse@  
10                    saveetha.com), ORCID ID: <https://orcid.org/0000-0002-8916-9544>

11                    <sup>3</sup> Physiology, Biochemistry and Post-Harvest Technology Division, ICAR-Central  
12                    Plantation Crops Research Institute, Kasaragod, Kerala, 671 124, India.  
13                    (ramesh.sv@icar.gov.in)

14                    <sup>4</sup> Department of Agriculture, School of Agriculture Sciences, Karunya Institute of  
15                    Technology and Sciences, Karunya Nagar, Coimbatore, Tamil Nadu, India

16                    <sup>5</sup> Sericultural Research Institute, Chengde Medical University, Chengde 067000,  
17                    China. (szc@cdmc.edu.cn)

18                    <sup>6</sup> Center for Plant Breeding and Genetics, Tamil Nadu Agricultural University,  
19                    Coimbatore, Tamil Nadu, India. (szc@cdmc.edu.cn)

20

21                    **Abstract**

22                    Glutaredoxins (Grxs) are small, ubiquitous, multi-functional proteins present in  
23                    different compartments of plant cells. A chloroplast targeted class I GRX (*CcGRXS12*)  
24                    gene was isolated from *Capsicum chinense* during the pepper mild mottle virus  
25                    (PMMoV) infection. Functional characterization of the gene was performed in *N.*  
26                    *benthamiana* transgenic plants transformed with native *C. chinense* GRX (*Nb:GRX*),  
27                    GRX-fused with GFP (*Nb:GRX-GFP*) and GRX truncated for the chloroplast targeting  
28                    sequences but fused with GFP (*Nb:Δ2MGRX-GFP*). Over-expression of *CcGRXS12*  
29                    inhibits the PMMoV-I accumulation at late stage of infection and is accompanied with  
30                    the activation of SA- pathway pathogenesis related (PR) transcripts, and suppression

CcGRXS12 protects plants from biotic and abiotic stresses

31 of JA/ET- pathway transcripts. Further the reduced accumulation of auxin-induced  
32 Glutathione-S-Transferase (pCNT103) in *CcGRXS12* over expressing lines indicates  
33 that the protein could able to protect the plants from the oxidative stress caused by the  
34 virus. PMMoV-I infection increases accumulation of pyridine nucleotides (PNs)  
35 mainly due to the reduced form of PNs (NAD(P)H) and it was higher in *Nb:GRX-*  
36 *GFP* lines compared to other lines where infection is limited. Apart from biotic stress,  
37 *CcGRXS12* protects the plants from abiotic stress conditions caused by H<sub>2</sub>O<sub>2</sub> and  
38 herbicide paraquat. CcGRXS12 exhibits GSH-disulphide oxidoreductase activity *in*  
39 *vitro* however devoid of complementary Fe-S cluster assembly mechanism in yeast.

40 **Keywords:** Pepper mild mottle virus- Italian strain (PMMoV-I), glutaredoxin (GRX),  
41 pyridine nucleotides (PNs), Glutathione-S-Transferase (GST), Glutathione (GSH),  
42 Pathogenesis- related (PR), Salicylic acid (SA), Jasmonic acid/Ethylene (JA/ET),  
43 Paraquat,

## 44 1. Introduction

45 Plant virus invasion subjugates the host machinery to express viral genes and induces  
46 oxidative stress conditions (Wang et al., 2021; Akbar et al., 2020). Plants manifest  
47 different strategies to arrest the spread of virus *viz*: development of hypersensitive  
48 response (HR) (Balint-Kurti, 2019); *R*- gene mediated resistance (Palukaitis & Yoon  
49 2020); silencing of viral genes (Wang et al., 2012; Ismayil et al., 2018) and RNA  
50 decay (Li and Wang, 2019). Apart from *R*-gene mediated resistance, many other  
51 plant-derived genes also protect the plants from the oxidative damage caused by virus  
52 through scavenging the ROS accumulation. ROS is scavenged through enzymatic  
53 proteins such as superoxide dismutase (SOD), catalase (CAT), peroxidase (PRX),  
54 ascorbate peroxidase (APX), glutathione S-transferase (GST), glutaredoxin (GRX)  
55 and glutathione peroxidase (GPX) (Waszczak et al., 2018). Exploring the functions of  
56 the differentially expressed host genes during the plant-pathogen interaction provides  
57 a better comprehension of plant genes-mediated resistance and also helps in designing  
58 a novel plant-protection strategy (Marmonier et al., 2022). In this study, Pepper Mild  
59 Mottle virus-Italian strain (PMMoV-I) belonging to *Tobamovirus* genus causing a  
60 serious economic losses to pepper crops (*Capsicum chinense*) (Wetter et al., 1984)  
61 was utilized to analyze the role of host-derived genes against virus infection. Through  
62 mRNA differential display PCR and RACE-PCR, a cDNA fragment corresponding to  
63 class I Glutaredoxin (*CcGRXS12*) gene was isolated from *C.chinense* plants during  
64 the compatible (PMMoV-I) and incompatible (PMMoV-S) viral infection.

CcGRXS12 protects plants from biotic and abiotic stresses

65 Glutaredoxins (GRXs) are small, ubiquitous, low molecular weight oxido-reductases  
66 sharing the structure with thioredoxin family of proteins and are well conserved  
67 among prokaryotes and eukaryotes (Holmgren, 1995). The number of GRXs reported  
68 in the photosynthetic organisms is found to be high and are classified into six classes.  
69 Class I (C1, C2, C3, C4, C5/S12 subgroup), Class II (S14, S15, S16, S17) and Class  
70 III (21 CC-type in Arabidopsis) are relatively well-characterized while other GRXs  
71 require further analysis (Couturier et al., 2009a). Individual class of GRX proteins has  
72 different catalytic activities and specific functions and thus various plant-derived  
73 GRXs coordinate different functions. Class I GRXs reduce the protein-protein  
74 disulphide bonds and protein-glutathione disulfide bonds by utilizing GSH as their  
75 reducing equivalent supplier (Rouhier et al., 2007). Class II GRXs reduce protein-  
76 glutathione disulphide bonds by utilizing ferredoxin-thioredoxin reductase (FTR) as  
77 their reducing equivalent supplier (Zaffagnini et al., 2008). Biochemical  
78 characterization of the Class III CC-type GRX proteins remain elusive as the soluble  
79 form of the protein could not be produced in the bacterial system (Couturier et al.,  
80 2010). The oxidoreductase property of the GRXs enables the protein to take part in  
81 many redox-dependent pathways leads to various protein activation/deactivation.

82 Recent studies have divulged the importance of GRXs during plant-pathogen  
83 interactions. GRXs cause susceptibility of the plants to the necrotrophic pathogens  
84 while the effect over biotrophic pathogens is quite different. Salicylic acid (SA)  
85 induced CC-type GRXs (GRXC9/ROXY19 and GRXS13/ROXY18) cause  
86 susceptibility to the necrotrophic pathogen *B. cinerea* (Ndamukong et al., 2007; La  
87 camera et al., 2011) by over accumulating H<sub>2</sub>O<sub>2</sub>. Similarly, over expression of rice  
88 and Arabidopsis CC-type glutaredoxin (ROXY1, ROXY2) accumulate H<sub>2</sub>O<sub>2</sub> and  
89 enhances the plants' susceptibility to *B. cinerea* (Wang et al., 2009). Yang et al.,  
90 (2022) have shown that over expression of *GsGRX4* makes the plants susceptible to  
91 *B.cinerea* by accumulating higher H<sub>2</sub>O<sub>2</sub> and also by suppressing the JA content and  
92 JA related marker gene. A member of the tomato CC-type GRX (*SIGRXC6*) reduce  
93 the accumulation of tomato leaf curl virus (TLCV) by interacting with the virus  
94 protein (Zhao et al., 2021). Over expression of the rice Class I GRX (*OsGRX20*)  
95 mediates resistance against bacterial blight (*Xanthomonas oryzae* pv. *Oryzae*; Xoo)  
96 (Ning et al., 2018). Tomato Class II glutaredoxin (*SIGRXI*) has no role against plant  
97 virus (Guo et al., 2010).

98 Phytohormonal pathway activation plays major roles during the pathogen attack and  
99 also at the time of plant growth & developments (Ma & Ma., 2016; Bozbuga et al.,  
100 2022). During pathogen attack, systemic acquired resistance (SAR) is developed at

CcGRXS12 protects plants from biotic and abiotic stresses

101 the distal part of the infection site, concomitant with the activation of various  
102 phytohormone pathways and accumulation of the corresponding pathogenesis related  
103 (PR) proteins (Van Loon and Van Strien, 1999). In general, resistance against  
104 biotrophs is mediated through SA-pathway activation, while jasmonic acid/ethylene  
105 (JA/ET)- pathway acts against necrotrophs. Plants have the ability to regulate the  
106 phytohormonal pathway based on the type of pathogen it encounters. SA pathway  
107 activation during the pathogen attack, suppresses the JA and auxin-dependent defence  
108 pathways (Vlot et al., 2009; Yang et al., 2015; Yuan et al., 2017) to fine tune the  
109 defense reaction. In plants, different phytohormones induce the expression of different  
110 GRXs (Yang et al., 2021; Sharma et al., 2013; Herrera-Vásquez et al., 2015; El-  
111 Kereamy et al., 2015; Malik et al., 2020) suggesting that GRXs transmit the  
112 information of phytohormonal pathway activation.

113 In the SA/JA signal transduction pathway, many transcription factors (TGA, ORA59)  
114 and various proteins are involved and GRX activates/deactivates the signaling  
115 components through its oxido-reductase property. In the NPR1-TGA transducing  
116 system, reduction of the co-activator (NPR1) and the transcription factor (TGA) is  
117 occurred before to their interaction. Following the NPR1-TGA interaction, the TGA  
118 protein could bind the as-1 elements of PR gene's promoters and mediates the  
119 transcription of PR genes (Després et al., 2000). SA- inducible GRX480 suppress the  
120 expression of JA induced PDF1.2 by interacting with TGA2 factor (Ndamukong et al.  
121 2007). In Arabidopsis, 17 of the 21 CC-type GRXs interact with TGA2 factor (Zander  
122 et al., 2012) implying GRXs interaction with TGA is an inevitable process. Apart  
123 from pathogen attack, many developmental activities are also influenced by the  
124 interaction of TGA transcription factors and GRXs (Gutsche et al., 2017; Ehrary et  
125 al., 2020; Ruan et al., 2018, 2022; Li et al., 2019; Uhrig et al., 2017). GRXs activate  
126 the TGA factor through their post-translational modification (Hou et al., 2019). SA  
127 pathway activation inhibits the expression of JA/ET-induced genes, through the  
128 repression of ORA59 (Pre et al., 2008; Van der Does et al., 2013) and CC-type GRXs  
129 are reported to suppress the ORA59 activation (Zander et al., 2012). Apart from  
130 acting as transducing element, GRXs influence the phytohormones pathways through  
131 synthesizing them (El-Kereamy et al., 2015). GRXs are actively engaged in the Fe-S  
132 cluster assembly mechanism (rev Lu, 2018).

133 In the present study, the functional characterization of *CcGRXS12* gene was carried  
134 out by over-expressing in *N.benthamiana* domin model plants. These plants are  
135 susceptible to PMMoV-I viral infection and the plants get recovered from PMMoV-I  
136 infection at later stage. This recovery phenomenon helps in obtaining molecular

CcGRXS12 protects plants from biotic and abiotic stresses

137 insights regarding the resistant mechanisms conferred by the gene during plant-virus  
138 interaction. The indispensable roles of GRX in the activation of phytohormone  
139 pathways were studied by analysing the corresponding PR transcript(s) accumulation.  
140 *CcGRXS12* role in altering the redox status of the cell was studied by analysing the  
141 accumulation of oxidized and reduced forms of pyridine nucleotides (PNs). In  
142 addition, we have deduced the function of *CcGRXS12* in relation to plant's abiotic  
143 stress tolerance and also in Fe-S cluster assembly mechanism.

## 144 **2. Materials and Methods**

### 145 **2.1. Plant materials and virus inoculation**

146 *C. chinense* N.J. Jacq. PI159236 ( $L^3L^3$ ) and various *N. benthamiana* transgenic plants  
147 were maintained in growth chambers at 32°C with 16 hrs of photoperiod, light  
148 intensity of 8000 lx and 70% relative humidity. For viral inoculation, first pair of the  
149 developed leaves from the plants was mechanically inoculated with purified virions at  
150 a concentration of 50µg/mL in inoculation buffer (0.02 M sodium phosphate buffer,  
151 pH 7.0), using carborundum as abrasive material. At 7 days post inoculation (dpi),  
152 samples were taken from inoculated and systemic leaves, for 14 and 21 dpi, samples  
153 from systemic leaves and for 28 dpi, samples were collected from the asymptomatic  
154 (recovered leaves) along with the symptomatic leaves.

### 155 **2.2. Viral strain, purification, and viral RNA extraction**

156 Pepper mild mottle virus - Italian strain (PMMoV-I), reporter earlier, was used in this  
157 work (Wetter et al., 1984). The protocols for purification of virion and viral RNA  
158 extraction were as enumerated earlier (Alonso et al., 1991; García-Luque et al., 1990).

### 159 **2.3. Isolation of *CcGRXS12* and sequence analysis**

160 Previous work in our lab, characterised the *Capsicum chinense* ( $L^3L^3$ ) (PI 159236)-  
161 derived transcript corresponding to Glutaredoxin gene when the plants were infected  
162 with compatible (PMMoV-I) and incompatible (PMMoV-S) viral strains. The  
163 complete sequence of the gene was characterised by following "mRNA Differential  
164 Display PCR" (Liang and Pardee, 1992) and RACE-PCR (Chenchik et al., 1998.)  
165 techniques. The chloroplast targeting region of the protein was predicted by chloroP  
166 1.1 programme (Emanuelsson et al., 1999). Protein sequence alignment was  
167 performed by Clustal W program (<http://www.ebi.ac.uk/Tools/msa/clustalw2/>).

### 168 **2.4. Measurement of oxidoreductase activity**

CcGRXS12 protects plants from biotic and abiotic stresses

169 The purified native protein was used to determine the GSH-disulfide oxidoreductase  
170 activity by HED assay (Holmgren and Aslund, 1995). To express the protein in  
171 prokaryotic system, the truncated CcGRXS12 protein (63 amino acids in length)  
172 tagged with 6X His-tag at its N-terminal region was cloned in pQE-1 vector (obtained  
173 from Dra.Maria Teresa). *E.coli* M15 (pREP4) strain was transformed with the plasmid  
174 harboring the cloned gene construct. Protein expression and native purification was  
175 performed by using His-select Nickel affinity gel resin column (Sigma Aldrich, USA)  
176 according to the manufacture's instruction. GRX activity was measured as an  
177 oxidation of NADPH in a reaction comprising 1mM GSH, 0.7mM  $\beta$ -hydroxy ethyl  
178 disulphide (HED), 0.25 mM NADPH and 6.4 $\mu$ g/mL glutathione reductase in Tris-Cl  
179 pH 7.4. The reaction mixture was incubated at room temperature for 2 min then the  
180 decrease in OD at 340 nm was recorded in a spectromax micro-plate reader for 1 min  
181 at room temperature. His-GRX protein was added to the same cuvette and the  
182 decrease in absorbance at 340 nm was recorded. Measured activities were normalized  
183 by correcting for the absorbance before the addition of GRX protein. One unit of  
184 activity is defined as the consumption of 1 $\mu$ mol of NADPH per minute calculated  
185 from the expression  $(\Delta A_{340} \times V) / (\text{min} \times 6.2)$ , where V is the cuvette volume in mL  
186 and 6.2 is the mM extinction coefficient for NADPH. Three independent experiments  
187 were performed at each substrate concentration, and the apparent  $K_m$  value and  $K_{cat}$   
188 values were calculated by non-linear regression using the program SigmaPlot 12.0.

## 189 **2.5. Transgenic plants**

190 *Nicotiana benthamiana* Domin transgenic plants constitutively expressing GFP  
191 (*Nb:GFP*; line 11), full length GRX (*Nb:GRX*; line 3), full length GRX fused with  
192 GFP (*Nb:GRX-GFP*; line 16) and truncated GRX (63aa) fused with GFP  
193 (*Nb: $\Delta$ 2MGRX-GFP*; line 40) were used. These transgenic lines were provided by Dr.  
194 Maria Teresa Serra Yoldi (Montes-Casado et al., 2010). The constructs were driven at  
195 their N-terminal by CaMV35S promoter and have NOS terminator at its C-termini.

## 196 **2.6. Plant total protein extraction**

197 Total protein from the fresh leaf samples (1mg) were extracted in 5  $\mu$ L Laemmli  
198 buffer (Laemmli, 1970). Briefly, samples were heated to 95°C for 5 min followed by  
199 sonication for 5 min in a water sonicator and then clarified by centrifugation at 20,000  
200 g for 5 min in a microcentrifuge. Total protein extracts (5  $\mu$ L) were resolved in SDS  
201 polyacrylamide gels (SDS-PAGE) using 17.5% and 4.5% polyacrylamide as solving  
202 and concentrating gels, respectively according to Laemmli (1970).

## 203 **2.7. Viral coat protein analysis**

CcGRXS12 protects plants from biotic and abiotic stresses

204 Total plant protein extracts (5  $\mu$ l) and a viral coat protein extracts of 5, 2.5 and 1.25  
205 ng were electrophoresed on 17.5% and 4.5% SDS-PAGE gel. The proteins were  
206 stained with coomassie blue R250 and PMMoV-I coat protein was quantified using a  
207 densitometer and the quantity one software (Bio-Rad, Hercules, CA, USA).

## 208 **2.8. Immunoblot analysis**

209 Total proteins separated by SDS-PAGE were electrotransferred onto PVDF  
210 membranes (Amersham). The membranes were initially blocked with PBST (3.2 mM  
211  $\text{Na}_2\text{HPO}_4$ , 0.5 mM  $\text{KH}_2\text{PO}_4$ , 1.3 mM KCl, 135 mM NaCl, 0.05% Tween 20, pH 7.2)  
212 containing 5% skimmed milk for 30 min. For the immunodetection of GRX, GFP and  
213 viral Coat protein (CP), the electro transferred membranes were incubated overnight  
214 at 4°C with the specific antisera of His-GRX (1/1000; raised in our lab), GFP specific  
215 polyclonal antibody (1/250; Santa Cruz Biotechnology, INC.) and PMMoV-I CP  
216 (1/1000; raised in our lab). Detection of antigen-antibody complexes was carried out  
217 with peroxidase-conjugated goat anti-rabbit IgG (GARPO) (Nordic) at 1/5000  
218 dilution. The immunoreaction was visualized with ECL chemiluminescence kit (GE  
219 Healthcare Amersham) following manufacturer's instructions. The enzymatic reaction  
220 produces a luminescent compound that is detected by visible light sensitive films  
221 (Hyperfilm, Pharmacia).

## 222 **2.9. Protoplast infection assay**

223 Protoplasts were obtained from the four different *N.benthamiana* transgenic lines as  
224 described by Ruiz del Pino et al., (2003) with a minor change in protocol. Protoplasts  
225 were washed a couple of times with ice-cold solution of 12% mannitol containing  
226 6mM  $\text{CaCl}_2$ . Protoplasts were counted and adjusted to the concentration of  $1.3 \times 10^6$   
227 protoplasts/mL using ice-cold electroporation buffer (12% mannitol, 6 mM  $\text{CaCl}_2$ , 80  
228 mM KCl, pH 7.2). For protoplasts infection,  $4 \times 10^5$  protoplasts in a final volume of  
229 300 $\mu$ L were taken in a 0.2 cm electroporation cuvette along with 20  $\mu$ g of PMMoV-I  
230 RNA and kept on ice. For transformation, a single pulse of 0.12kV and 125  $\mu$ F was  
231 applied with a Gene Pulser (Bio-Rad laboratories, Hercules, CA) immediately after  
232 addition of 20  $\mu$ g of viral RNA. Following the pulse, the protoplasts were kept on ice  
233 for 20 min and diluted in CPW-M13. Later, centrifuged at 80 $\times$ g for 5 min and diluted  
234 to  $5 \times 10^5$  protoplasts/mL in CPW-M13 and incubated at 25°C under dark. Protoplasts  
235 were harvested at 16, 24 and 48 hrs with a short spin of 134g, and a couple of washing  
236 in mannitol buffer and the resultant protoplast was re-suspended in 5X Lammeli  
237 buffer. The viral infection was detected by western blot method using PMMoV-I coat  
238 protein specific antibody.

CcGRXS12 protects plants from biotic and abiotic stresses

## 239 **2.10. Sub-cellular localization studies of CcGRXS12 protein**

240 For analyzing the sub cellular localization of CcGRXS12 protein, protoplasts obtained  
241 from the different *GFP* expressing transgenic lines (*Nb:GFP*, *Nb:GRX-GFP* and  
242 *Nb:Δ2MGRX-GFP*) were fixed with 4% formaldehyde in 9% mannitol (pH 7.2). To  
243 label the nuclei, DAPI staining was performed. In brief, 10<sup>4</sup> protoplasts were  
244 incubated with 100μL of 2μg/mL DAPI solution in PBS-9% mannitol for 5 min. To  
245 that 900μl of PBS-9% mannitol was added and kept for another 15 minutes, and then  
246 the protoplasts were collected and washed with PBS-9% mannitol for twice and  
247 finally suspended in 100 μL PBS-9% mannitol. Around 20μL of this sample was  
248 loaded over poly-L-lysine coated glass slides for visualization. For  
249 compartmentalization study, autofluorescence from chlorophyll and DAPI staining at  
250 nuclei were analyzed. Different fluorescent signals were detected at specific  
251 wavelengths [GFP detection at 550nm (excitation 580nm), chlorophyll  
252 autofluorescence at 540nm (excitation 600nm) and DAPI at 610nm (excitation at  
253 650nm)] using a TCSP Leica microscope.

## 254 **2.11. RNA isolation and probe preparation**

255 Total leaf RNA was extracted according to the method prescribed by Chomcynski and  
256 Sacchi, (1987) by using TRIzol reagent and following the manufacturer's instruction  
257 with a slight modification Briefly, additional centrifugation at 12,000 g for 10 min at  
258 4°C after plant tissue homogenization and an additional final RNA precipitation step  
259 with 0.3 M sodium acetate pH 5.2 and 2.5 volumes of 100% ice-cooled ethanol were  
260 performed for overnight. The digoxigenin-labelled RNA probes were prepared using  
261 the linearized plasmids harbouring various gene products according to the instructions  
262 enumerated in MAXIscript kit manual. The cloned gene products, for preparing the  
263 riboprobes, were: salicylic acid pathway marker proteins (PR-1, PR-2a and PR-5), the  
264 JA/ET pathway marker protein (PR-2d) and the gene for auxin inducible Glutathione-  
265 S-Transferase (GST) (pCNT103) (obtained from Carmen Castresana), the clone pT-  
266 CPS containing the 593 bp from PMMoV-S CP (Gilardi et al., 1998)

## 267 **2.12. Northern blot hybridization**

268 For Northern blot analysis, RNA samples (10 μg) were denatured at 65°C for 4 min in  
269 MOPS-Acetate-EDTA buffer (20 mM MOPS, 15 mM sodium acetate, 3 mM EDTA  
270 pH 7.0) in the presence of 10% formamide, 0.9% formaldehyde and 0.06 mg/mL  
271 ethidium bromide. Then the samples were electrophoresed onto 1.5% agarose-  
272 formaldehyde gels containing MOPS buffer (50 mM MOPS, 0.4 mM EDTA pH 7)  
273 and 6% formaldehyde, using MOPS electrophoresis buffer under a current of 5 V/cm.



CcGRXS12 protects plants from biotic and abiotic stresses

274 Once visualized by UV light illumination, the RNAs were transferred by capillarity to  
275 nylon membranes (Hybond-N, Pharmacia), as described in Sambrook et al., (1989),  
276 and fixed to the membrane by irradiation with UV light (120 mJ) in a UV Stratalinker  
277 apparatus (Cultek). The membranes with transferred RNA were stored in cold  
278 condition for later use.

279 For hybridization with digoxigenin-labelled RNA probes, the membranes were  
280 incubated with standard buffer (5xSSC, 0.1% sodium-lauroylsarcosine, 0.02% SDS  
281 and 2% blocking reagent, blocking reagent is provided by manufacturer) for 2 hrs at  
282 65°C. Then the membranes were hybridized overnight at 68°C with specific RNA  
283 probes in standard buffer containing 100 ng of the corresponding probe. After  
284 hybridization, the membranes were washed twice in (2x SSC solution, 0.1% SDS) for  
285 15 min each at room temperature (RT) and twice in (0.1 x SSC, 0.1% SDS) for 15  
286 min at 65°C. Probe detection was performed using the DIG luminescent detection kit  
287 (Roche, Penzberg, Germany) according to manufacturer's protocol. In brief,  
288 membranes were incubated in blocking solution of maleic buffer (0.1M Maleic acid,  
289 0.15M NaCl) containing 1% blocking reagent- for 30 min, then in antidigoxigenin  
290 alkaline phosphatase conjugated antibody at 1:10,000 for 30 min followed by washing  
291 twice in washing buffer. After equilibration in detection buffer, membranes were  
292 incubated with chemiluminescent substrate CSPD and exposed to X-ray sensitive  
293 films (Hyperfilm, Pharmacia) for 30 min.

### 294 **2.13. Measurement of pyridine nucleotide (PN) contents**

295 PN contents in the mock and PMMoV-I-infected plants at 28 dpi were analyzed by  
296 grinding 30 mg of fresh leaf sample with ball bearings and centrifuged for 12,000 g  
297 for 1min. The supernatant obtained was used for selective extraction of NAD(P)H in  
298 acid medium and NAD(P)+ in alkaline medium (Hajirezaei et al., 2002). The samples  
299 were neutralized to the final pH of 8.0 to 8.5 and made as 100µL aliquots and frozen  
300 at -80°C for later analysis. PNs in the neutralized extracts were determined following  
301 Gibon et al., (2004). Statistical difference was analysed by SAS 9.1 programme (SAS  
302 9.1 Inc.) using one-way analysis of variance (ANOVA).

### 303 **2.14. Abiotic stress tolerance assay**

304 Role of *CcGRXS12* in abiotic stress tolerance was analyzed by growing different *N.*  
305 *benthamiana* transgenic plants in one-half MS media in the presence and absence of  
306 3mM H<sub>2</sub>O<sub>2</sub> and 1 µM paraquat. The seedlings were grown horizontally for the first 3  
307 days and then grown in vertical position for another one week. Root length was  
308 measured after 10 days. The experiments were performed in triplicates of 30 seedlings

CcGRXS12 protects plants from biotic and abiotic stresses

309 each and repeated thrice. The seedlings were grown at 25°C and 16 h of photoperiod.  
310 Statistical difference was analysed by SAS 9.1 programme (SAS 9.1 Inc.) using one-  
311 way analysis of variance (ANOVA).

### 312 **2.15. Heterologous expression of *CcGRXS12* in *S.cerevisiae***

313 To clone and express CcGRXS12 mature protein in yeast cells, pGEM-T easy vector  
314 (pGEM-GRX), harbouring the full length *CcGRXS12* gene was used. Gene specific  
315 primers were designed to amplify the full length gene excluding the chloroplast  
316 targeting region. Further in order to prevent codon breakage while expression in yeast,  
317 we introduced ‘g’ nucleotide (small letter) immediately after the *Not* I site in the  
318 forward primer (5´-ATAAGAATGCGGCCGCgTCGGGTTCATTCGGGTCC-3´)  
319 which introduce alanine at the end of the mitochondrial targeting region. The reverse  
320 primer (5´- GAAGATCTGCTTTCTGTTTTTCCAGGATTA-3´) had an overhang of  
321 *Bgl* II site. The amplified fragment was cloned in to pMM221 vector (obtained from  
322 Dr.E.Herrero, Universitat de Lleida, Lleida, Spain) which contains the yeast  
323 mitochondrial targeting sequence at its 5´ end and 3HA/His6 tag at its 3´ end (Molina  
324 et al., 2004). The resultant plasmid containing the *CcGRXS12* gene sequence was  
325 transformed into yeast  $\Delta grx5$  mutants and the selection of the transformants were  
326 performed following Rodriguez-Manzaneque et al., (1999).

### 327 **2.16. Growth conditions of *S.cerevisiae***

328 The yeast strains employed in this study are: wild type (W303-1B; WT),  $\Delta grx5$   
329 mutant (MML100;  $\Delta grx5$ ) and yeast *GRX5* expressing in  $\Delta grx5$  mutants (MML240;  
330  $\Delta grx5/GRX5$ ) were already reported in Rodriguez-Manzaneque et al., (1999) and the  
331 *CcGRXS12* transformed in yeast  $\Delta grx5$  mutant strain ( $\Delta grx5/CcGRXS12$ ) (in this  
332 work). All yeast strains were grown in YPD, respiratory defective YPG and SC media  
333 as mentioned in Rodriguez-Manzaneque et al., (2002). For oxidant sensitive assay,  
334 above mentioned yeast strains were grown in the media containing 0.3mM tert-butyl  
335 hydroperoxide (t-BOOH) and 1.25mM diamide (Sigma Aldrich, USA) in a serial  
336 dilution of 1:10 and incubated for 3 days.

### 337 **2.17. *CcGRXS12* in Fe-S cluster assembly mechanism**

338 Role of *CcGRXS12* in Fe-S cluster assembly mechanism was studied by analysing the  
339 accumulation level of free iron (Fish, 1988), and also by measuring the relative ratio  
340 of aconitase to malate dehydrogenase activity (Robinson et al., 1987) for the  
341 aforementioned yeast strains.

CcGRXS12 protects plants from biotic and abiotic stresses

### 342 **3. Results**

#### 343 **3.1. Sequence features of *Capsicum chinense* glutaredoxin**

344 Sequence analysis of *Capsicum chinense* glutaredoxin gene (*CcGRX*) showed that the ORF  
345 comprises 531bp and its amino acid prediction showed it codes for 177aa. Protein sequence  
346 analysis revealed that it possess CSYS active site which is the characteristics of Class I / S12  
347 GRXs. Based on the analysis, the isolated gene was named as *CcGRXS12*. Sequence  
348 alignment of the isolated GRX with the well characterized Poplar GRX (PtGRXS12)  
349 (Coutruiet et al., 2011) protein showed that apart from CSYS active site, other motifs such as  
350 ELD, TVPN, GG and second cysteine were conserved between these two proteins (Fig.1A).

#### 351 **3.2. CcGRXS12 possesses GSH-disulfide oxidoreductase activity:**

352 Mature form of the CcGRXS12 protein (114 aa) without the chloroplast targeting region was  
353 cloned in pQE1 vector and expressed in M15 (pREP4) *E.coli* expression system. Purification  
354 of native protein was carried out using nickel affinity column. The predicted molecular mass  
355 and pI for the protein were 13.8 kDa and 8.24 respectively. Specific activity of the protein  
356 (0.12U/nM) was calculated by varying the concentration of His-CcGRXS12 from 10 nM to  
357 125 nM by keeping GSH concentration as 1 mM (Fig.1B). The correlation kinetics between  
358 the protein and GSH was measured by keeping the protein concentration at 84 nM and  
359 varying the GSH concentration from 0.5 mM to 5 mM (Fig.1C). The apparent  $K_m$  ( $4.9 \pm 1.9$   
360 mM) and apparent turnover  $K_{cat}$  ( $14.63 \pm 4.8 \text{ sec}^{-1}$ ) values were calculated using the  
361 Michaelis-Menten equation and the catalytic efficiency value ( $K_{cat}/K_m$  ( $M^{-1}Sec^{-1}$ )) was found  
362 to be  $3.05 \times 10^3$ . *In vitro* assay showed that CcGRXS12 protein participates in  
363 deglutathionylation reaction.

CcGRXS12 protects plants from biotic and abiotic stresses

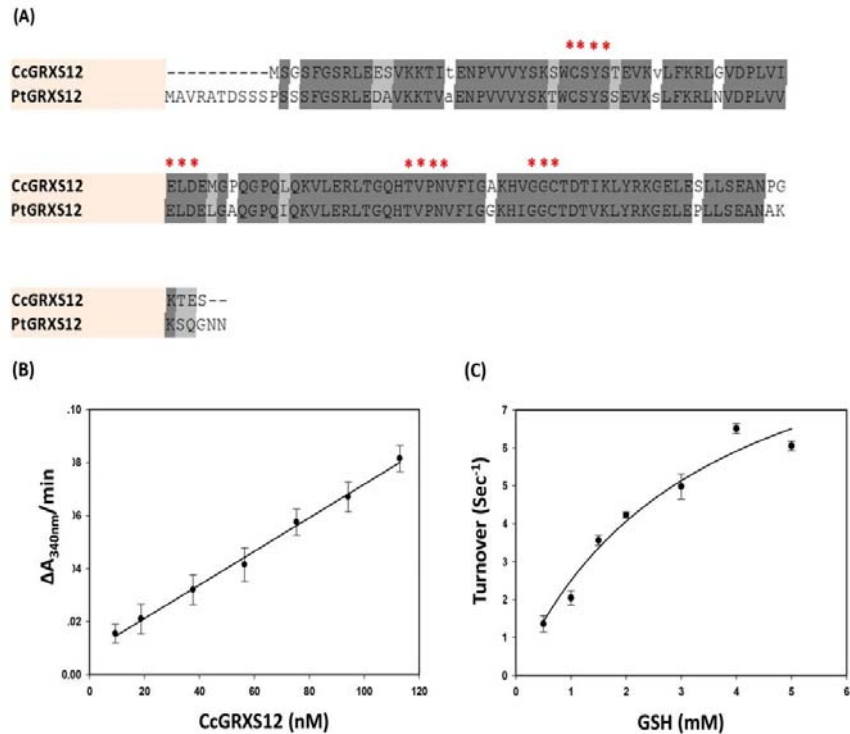

364

365 Fig.1. (A) Comparative protein sequence alignment of isolated GRX (CcGRXS12) with GRX  
366 characterized from Poplar (PtGRXS12). Sequence features have shown that besides the  
367 conserved CSYS active site, there are many conserved regions between these two proteins.  
368 (B) Linear dependence of HED activity on CcGRXS12 concentration is expressed as  
369  $\Delta A_{340}/min$ . (C). Variations of the apparent turnover during hydroxyethyl disulphide (HED)  
370 assay were calculated by varying concentrations of GSH (0.5 to 5mM). The data are  
371 represented as mean  $\pm$  S.D. The best fit was obtained using the Michaelis-Menten's equation  
372 using non-linear regression analysis.

### 373 3.3. Selection and analysis of CcGRXS12 over-expressing lines

374

375 For investigating the functional role of GRX, different *N.benthamaina* transgenic plants were  
376 used. The gene constructs developed and utilized for the genetic transformation of *N.*  
377 *benthamaina* are depicted (Fig.2A). The transgenic plants were grown in a media containing  
378 high concentration of kanamycin. The expression level of the gene in the T3 transgenic plants  
379 were analyzed by Western blot method (Fig. 2B). Analysis showed that the expression of  
380 CcGRXS12 in *Nb:GRX-GFP* lines was found to be  $\sim$  10 times higher than the other two  
381 CcGRXS12- expressing lines. Phenotypic analysis reveals that *Nb: $\Delta$ 2MGRX-GFP* lines show  
382 stunted growth and wide leaf surface area when compared with free *GFP* and other  
383 CcGRXS12 over-expressing lines.

CcGRXS12 protects plants from biotic and abiotic stresses

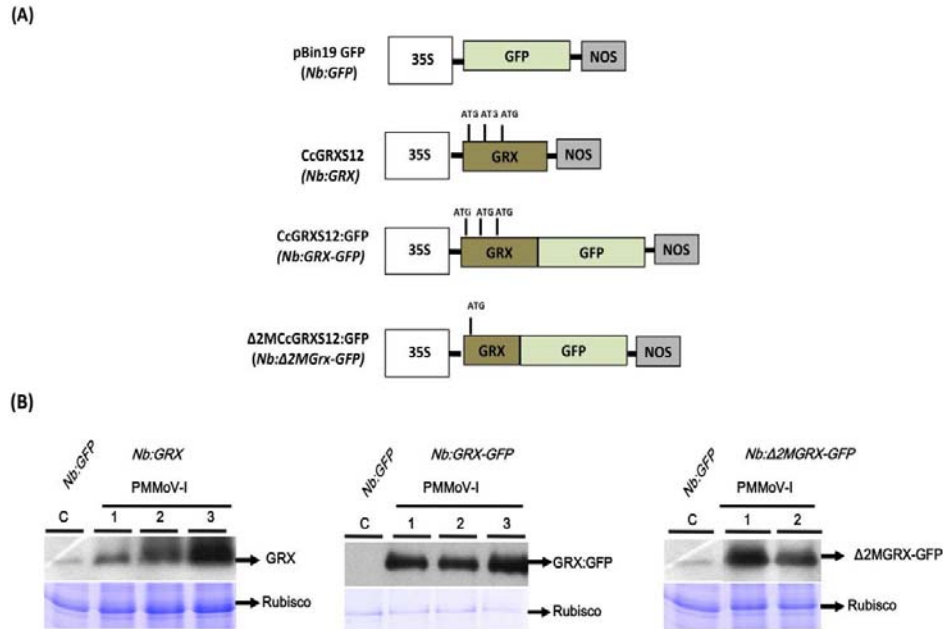

384

385 Fig.2. (A) Various gene constructs harboring GRXs used for the transformation of  
386 *N.benthamiana* plants and the resultant transgenic lines are mentioned in the parenthesis. (B)  
387 Western blot analysis of CcGRXS12 expression in the upper leaves of *N. benthamiana*  
388 infected transgenic lines. The protein extracts from *Nb:GRX-GFP* are diluted 10 times when  
389 compared with other lines. Lower panels show coomassie staining of total proteins as  
390 loading control.

391

### 392 3.4. Sub-cellular localization of *CcGRXS12*

393 To investigate the *in vivo* sub-cellular localization of *CcGRXS12*, expression of *GFP*-fused  
394 *CcGRXS12* gene was analyzed in the protoplasts of different transgenic lines *viz.*, *Nb:GFP*,  
395 *Nb:GRX-GFP* and *Nb:Δ2MGRX-GFP* utilizing confocal microscopy. The fluorescence of the  
396 native GRX-fused GFP superimposed with chloroplast while the free GFP expressing line  
397 (*Nb:GFP*) and the line over-expressing the truncated form of the GRX fused GFP  
398 (*Nb:Δ2MGRX-GFP*) showed expression signal throughout the cytoplasm and also in the  
399 nuclei (Fig.3A). These results confirmed that *CcGRXS12* is targeted to the chloroplast and  
400 the N-terminus amino acids (63 in number) are essential for the protein to get localized in  
401 chloroplast. Western blot analysis with GRX- and GFP-specific antibodies shows that the  
402 GRX expression in the transgenic lines are GFP fused one (Fig. 3B).

CcGRXS12 protects plants from biotic and abiotic stresses

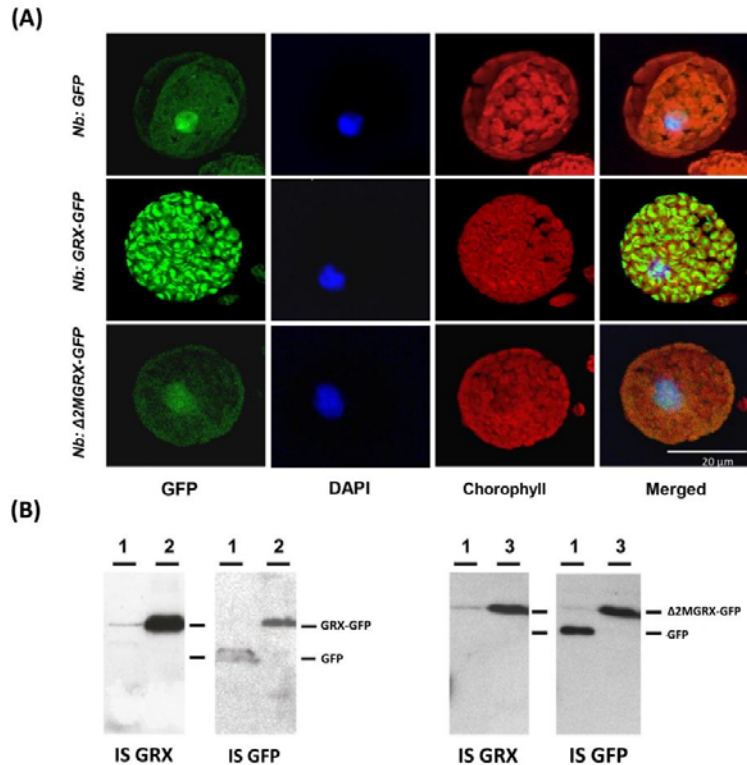

403

404 Fig.3. (A) Confocal microscopic study of *CcGRXS12* in *N.benthamiana* protoplast obtained  
405 from different transgenics. The protoplasts obtained from different transgenic lines expressing  
406 *GFP* are used for analysis: *Nb:GFP* ; *Nb:GRX-GFP*; *Nb:Δ2MGRX-GFP*. (B) Western blot  
407 analysis of *CcGRXS12* fused *GFP* and free *GFP* in the transgenic lines (1. *Nb:GFP*; 2. *Nb:*  
408 *GRX-GFP*; 3. *Nb:Δ2MGRX-GFP*). Visualization was performed for *GFP* fluorescence,  
409 chlorophyll autofluorescence, and nuclear staining with DAPI.

### 410 3.5. Over expression of *CcGRXS12* inhibits PMMoV-I accumulation

411 A time-course study (7, 14 and 28 dpi) on viral coat protein (CP) titres in the control and *GRX*  
412 over-expressing transgenic lines following viral infection were analyzed utilizing coomassie  
413 stained gels. At 7 dpi, no difference in viral CP accumulation was found between the  
414 inoculated and systemic leaves and also between the different transgenic lines while at 14 and  
415 28 dpi *CcGRXS12* over-expressing lines showed reduced accumulation of viral CP compared  
416 with control plants that were transformed with vector devoid of *GRX*. At 28 dpi, transgenic  
417 lines over-expressing *CcGRXS12* showed a significant reduction in viral CP accumulation  
418 compared to the *GFP* expressing lines (Fig.4A). Northern blot analysis for viral gRNA  
419 accumulation showed that at early stage of infection (7 dpi), no difference exists between the  
420 systemic and inoculated leaves and also between different transgenic lines (Fig.4B). However,  
421 at the late stage of infection (28 dpi), the transcript level of viral gRNA in the *Nb:GFP*  
422 infected plants were relatively high than other *CcGRXS12* over-expressing lines. The relative

CcGRXS12 protects plants from biotic and abiotic stresses

423 ratio of viral RNA accumulation in the *Nb:GRX*, *Nb:GRX-GFP* and *Nb:GRX-GFP* were 0.65,  
 424 0.05 and 0.11 respectively when the value was set at 1.0 for the *Nb:GFP* infected lines  
 425 (Fig.4B). It demonstrates that over-expression of *CcGRXS12* is not inhibiting virus  
 426 accumulation at early stage but it severely attenuates the accumulation of viral nucleic acids  
 427 during the later stages of infection.

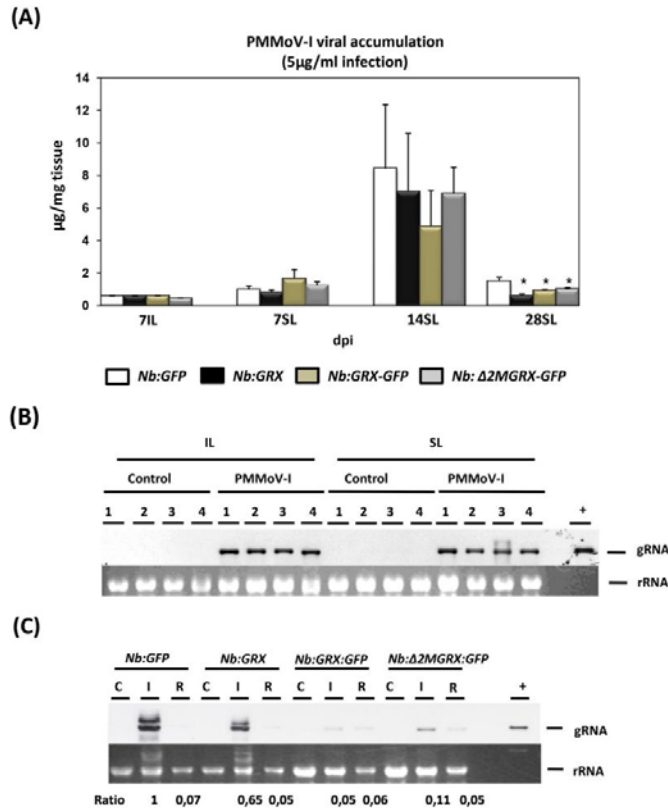

428

429 Fig.4. (A) PMMoV-I coat protein accumulation at different time periods (7,14, & 28 dpi) in  
 430 different transgenic lines of *N. benthamiana*. IL-Inoculated leaves; SL- Systemic leaves.  
 431 Results are the median of three experiments and are expressed as µg of virus per mg of fresh  
 432 tissue. Standard deviation are shown and significant differences with respect to *Nb:GFP* are  
 433 indicated by asterisks ( $p < 0.05$ ). Northern blot analysis of viral RNA accumulation at 7 dpi (B)  
 434 and 28 dpi (C). The different transgenic lines are represented with numbers. In Fig.B, 1-  
 435 *Nb:GFP*; 2-*Nb:GRX*; 3-*Nb:GRX-GFP* and 4-*Nb:Δ2MGRX-GFP*. The samples analyzed at 28  
 436 dpi are marked with alphabets. C-mock control; I- infected; R-recovered leaves. Around 50  
 437 ng of RNA extracted from PMMoV-I virus was used as positive control (+). Ratio shown at  
 438 28 dpi are the ratio of gRNA accumulation with respect to *Nb:GFP* lines. The lower panels of  
 439 (B) and (C) are the ribosomal RNA (rRNA) stained with ethidium bromide that served as  
 440 loading control.

441 **3.6. *CcGRXS12* does not inhibit viral RNA replication**

CcGRXS12 protects plants from biotic and abiotic stresses

442 In order to study the inhibitory role of *CcGRXS12* towards viral replication, protoplasts  
443 obtained from different transgenic lines were infected with viral RNA and the accumulation  
444 of the viral CP dynamics was investigated. Viral CP accumulation was ascertained through  
445 western blot and it was found to be similar in all lines irrespective of *GFP*- or *CcGRXS12*-  
446 expressing lines (Fig.5A). It shows that *CcGRXS12* is not inhibiting the viral RNA  
447 replication.

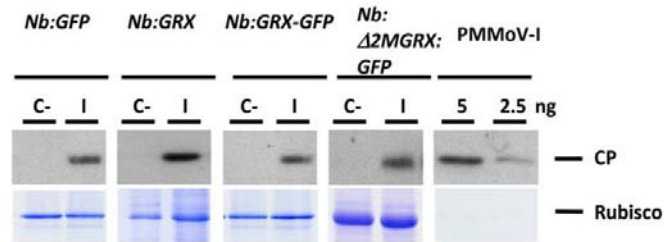

448

449 Fig.5. Detection of PMMoV-I coat protein (CP) by western blot using the protoplasts of  
450 different transgenic lines. Purified PMMoV-I (5 and 2.5 ng) was used as positive control. C-  
451 control uninfected protoplast; I- infected protoplast. Lower panels show Coomassie staining  
452 of protein as loading control.

### 453 3.7. Expression dynamics of transcripts of defence genes

454 To understand the virus resistant mechanism provoked by *CcGRXS12* in plants, the  
455 expression of selective transcripts involved in SA pathway (PR-1, PR-5 and PR-2a), JA/ET  
456 pathway (PR-2d) (Van Loon et al., 2006), auxin induced GST marker (pCNT103) (van der  
457 Zaal et al., 1987; Droog et al., 1995) were analysed during early (7 dpi) and late stages (28  
458 dpi) of viral infection. At 7 dpi, samples were taken from the inoculated and systemic leaves  
459 of the infected plants while at 28 dpi, plants recovered from PMMoV-I infection, thus  
460 analysis were done in both the symptomatic and asymptomatic leaves. PMMoV-I -inoculated  
461 leaves from *N. tabacum* cv Xanthi (a well-documented PR protein expressing host) (Stintzi et  
462 al., 1993; Van Loon et al., 2006), was considered as a positive control for the analysis.

463 At 7 dpi, high level of SA- pathway related PR transcript accumulation was found in the  
464 PMMoV-I- inoculated leaves with no detection in the mock-inoculated leaves, and the level  
465 of expression is same irrespective of the transgenic plants (Fig.6A). Expression of basic PR-  
466 2d was found in both the mock- and PMMoV-I- inoculated leaves as the mechanical injury  
467 induce JA/ET marker genes. Systemic leaves of the PMMoV-I infected plants showed low  
468 level of expression while no expression in the mock-inoculated control plants.

469 At 28 dpi, in the mock-inoculated plants, the accumulation of SA -pathway PR transcripts  
470 were found in the *CcGRXS12* over expressing lines that were targeted to the chloroplast. In



CcGRXS12 protects plants from biotic and abiotic stresses

471 the symptomatic leaves of the PMMoV-I infected plants, high level of SA -pathway PR  
 472 transcripts were accumulated in the *Nb:GRX*, and *Nb:GRX-GFP* transgenic lines whereas in  
 473 the *Nb:GFP* and *Nb:Δ2MGRX-GFP* lines a little expression was found. The accumulation of  
 474 JA/ET pathway (PR-2d) and GST (pCNT103) transcripts were found to be suppressed in the  
 475 *Nb:GRX*, and *Nb:GRX-GFP* transgenic lines when compared with the *Nb:GFP* and  
 476 *Nb:Δ2MGRX-GFP* lines. In the asymptomatic (recovered) leaves of the PMMoV-I infected  
 477 plants, the accumulation of SA pathway PR transcripts were found to be very high (2-3 folds),  
 478 whereas no difference for JA/ET pathway marker transcript was observed when compared to  
 479 the symptomatic leaves. Between the transgenic lines, no differences in accumulation of  
 480 transcripts involved in the SA-pathway and JA/ET exist whereas the GST (pCNT103) marker  
 481 transcript was reduced in the *CcGRXS12* expressing lines when compared to the free *GFP*  
 482 expressing control line.

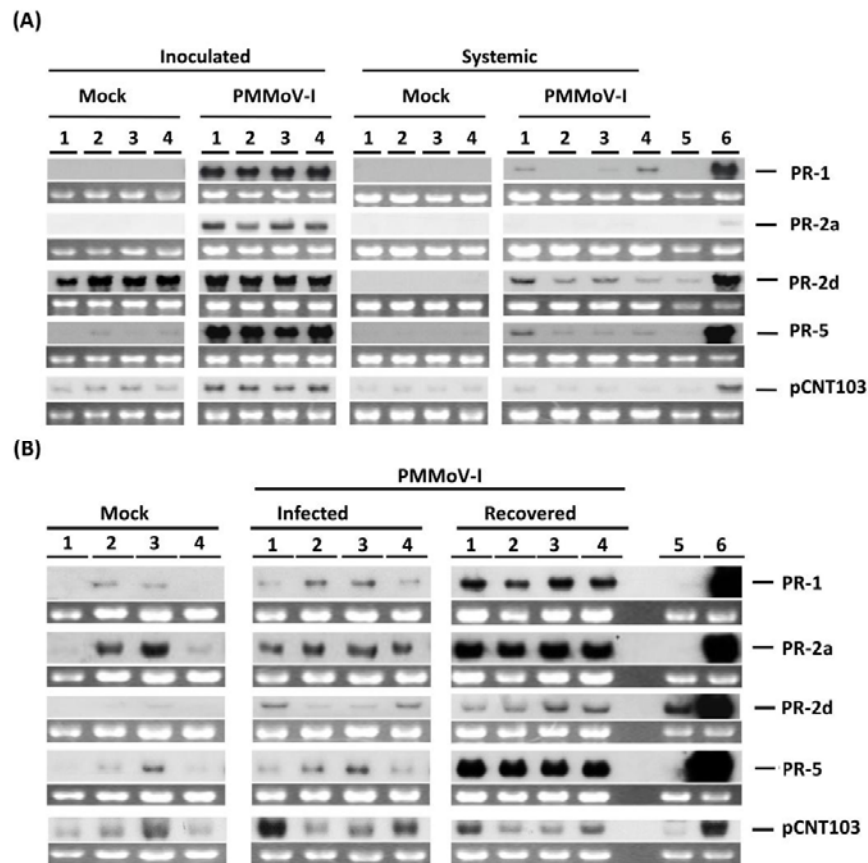

483

484 Fig.6. Northern blot analysis of PR transcripts involved in different hormonal pathways (SA,  
 485 JA/ET & auxin) from mock and PMMoV-I infected plants. The expression analysis was  
 486 performed at 7 dpi (A); and 28 dpi (B). The different transgenic lines are marked with  
 487 numbers represent: 1- *Nb:GFP*; 2-*Nb:GRX*; 3-*Nb:GRX-GFP* and 4-*Nb:Δ2MGRX-GFP*; 5 and  
 488 6- mock and PMMoV-I inoculated leaves from *N. tabacum Xanthi* nc plants respectively. The

CcGRXS12 protects plants from biotic and abiotic stresses

489 lower panel of each probe shows the ribosomic RNA (rRNA) stained with ethidium bromide.  
490 The control (mock) and infected plants are marked above the figure.

491 **3.8. Effect of *CcGRXS12* over expression on redox carrier molecules:**

492 At the late stage of PMMoV-I infection (28 dpi), viral suppression and differences in  
493 phytohormonal PR transcript accumulation were observed in the *CcGRXS12* over expressing  
494 plants. Redox carrier molecules are known to play significant roles during the pathogen attack  
495 and during the induction of defense genes (Pétriacoq et al., 2013). Hence the accumulation of  
496 redox carrier molecules (oxidized and reduced forms of PNs) were analysed in all the  
497 transgenic plants at late stage of infection (28 dpi). The samples analyzed were leaves of  
498 mock-control, symptomatic (infected) and asymptomatic (recovered) PMMoV-I infected  
499 plants.

500 In the mock-inoculated control plants, the accumulation level of PNs (NAD(P)/(H)) in the  
501 free GFP- and *CcGRXS12*- over expressing lines were similar and no significant difference  
502 exist among the different lines. Compared to the mock- control plants, the PMMoV-I infected  
503 plants (symptomatic leaves) showed high, yet non-significant, accumulation of oxidized form  
504 of PNs (NAD<sup>+</sup> and NADP<sup>+</sup>). Asymptomatic leaves, showed higher accumulation of (NAD<sup>+</sup>  
505 and NADP<sup>+</sup>) and the accumulation level of NADP<sup>+</sup> is significantly higher than observed in the  
506 mock-control and symptomatic plants.

507 In the PMMoV-I infected plants, accumulation of the reduced form of PNs (NADH &  
508 NADPH) in the symptomatic and asymptomatic leaves were significantly increased compared  
509 to mock-control plants. NADH accumulation in the symptomatic leaves was 7-9 times higher  
510 than the mock-control plants. The accumulation level of NADH in the *Nb:GRX-GFP* line was  
511 found to be significantly high when compared to other lines. Although increase in NADH  
512 level was observed in the asymptomatic leaves, the accumulation level was lower than the  
513 symptomatic leaves of the infected plants. The NAD pool is increased considerably in the  
514 infected plants and it is mainly due to NADH accumulation. Thus, in the PMMoV-I infected  
515 plants the NAD pool gets shifted considerably towards its reduced form. Increase in NADPH  
516 content was found in the PMMoV-I infected plants (symptomatic and asymptomatic leaves)  
517 and symptomatic infected plants showed significantly higher accumulation. As with NADH,  
518 the accumulation of NADPH in the infected *Nb:GRX-GFP* plants was significantly higher  
519 when compared with other lines. Even though the level of NADPH is increased in the  
520 PMMoV-I infected plants, the NADP pool is maintained in the oxidized state.

521

CcGRXS12 protects plants from biotic and abiotic stresses

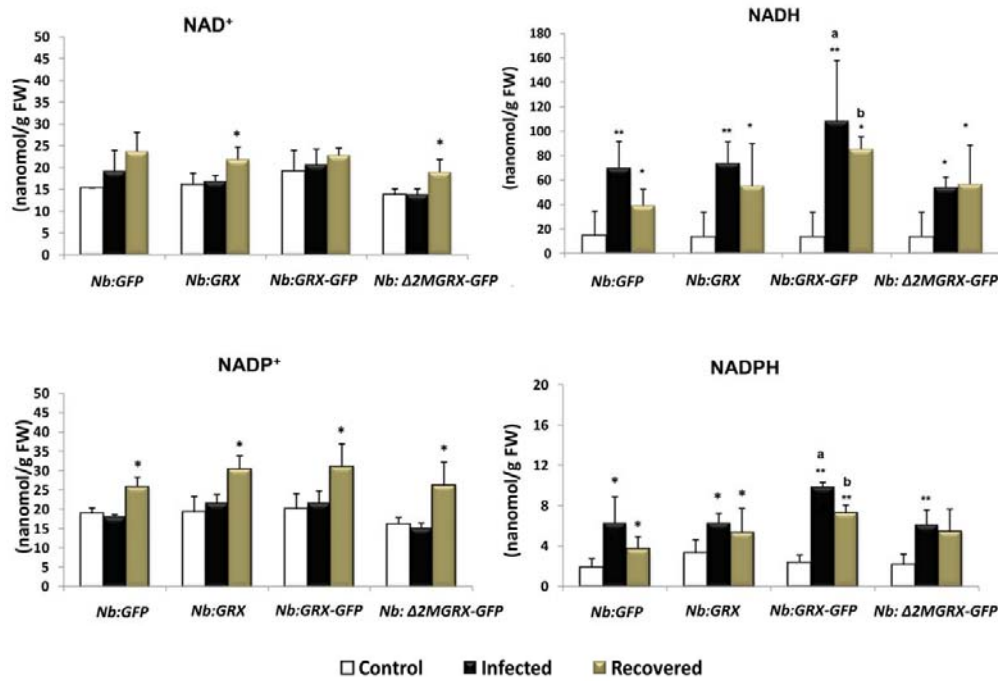

522

523

524 Fig.7. Analysis of pyridine nucleotides (PN) contents in the control, infected and recovered  
525 leaves of different transgenic lines. The levels of NAD<sup>+</sup>, NADP<sup>+</sup>, NADH and NADPH were  
526 expressed as nanomoles per gram of fresh tissues (nmol/g FW). The significant difference  
527 between the mock inoculated control and PMMoV-I infected plants is indicated by asterisks  
528 (\*)significant difference when (p<0.05) and double (\*\*)significant differences when  
529 (p<0.001). Significant differences among the different lines in PMMoV-I infected plants and  
530 recovered plants is noted by the alphabetical letter 'a' and 'b' respectively in which the value  
531 of p<0.05.

### 532 3.9. Role of *CcGRXS12* in abiotic stress tolerance:

533 Contribution of *CcGRXS12* to abiotic stress tolerance was analysed by root growth assay.  
534 When transgenic lines were grown in the media containing 3 mM H<sub>2</sub>O<sub>2</sub> or 1 μM paraquat,  
535 plants over expressing *CcGRXS12* and its derivatives showed significantly increased primary  
536 root elongation than the free *GFP* transgenic line (P<0.05) (Fig.11B). The effect of paraquat  
537 treatment was stronger than the H<sub>2</sub>O<sub>2</sub>. The abiotic stress tolerance observed was independent  
538 of protein localization as *Nb:Δ2MGRX-GFP* transgenic lines also show better growth in the  
539 oxidative media. No significant differences exist between the free *GFP* and *CcGRXS12* over-  
540 expressing plants when grown in the control media. Thus, over expression of *CcGRXS12* in  
541 plants increased the abiotic stress tolerance caused by either H<sub>2</sub>O<sub>2</sub> or paraquat.

CcGRXS12 protects plants from biotic and abiotic stresses

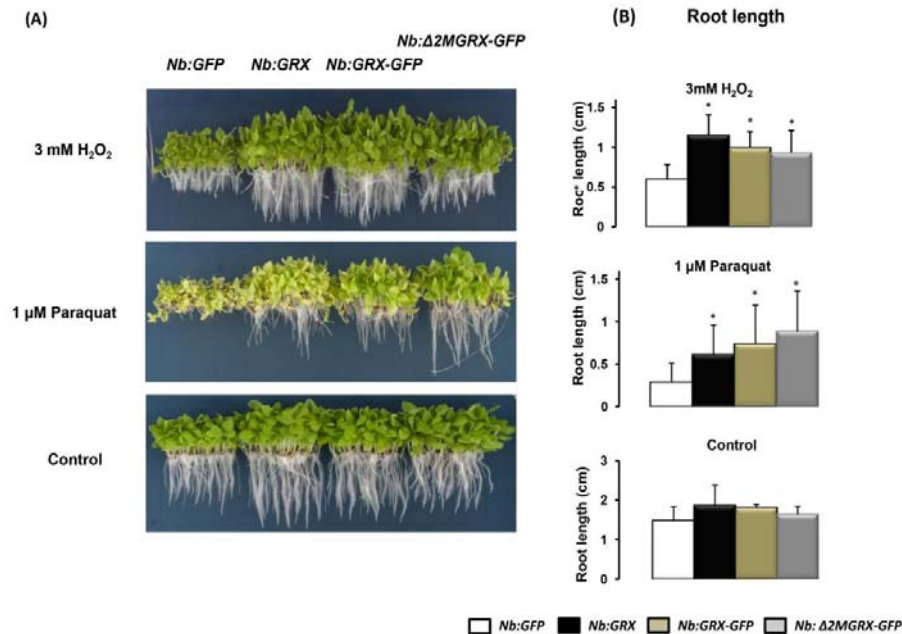

542

543 Fig.8. (A) Phenotype of 12 days old *N. benthamiana* transgenic lines grown under normal and  
544 oxidative stress conditions (B) Root length measurement of 30 seedlings for triplicate. The  
545 length of the primary roots of seedlings was measured in cm. Significant differences between  
546 the *Nb:GFP* and *CcGRXS12* over expressing lines are represented by asterisks (\*) where  
547  $p < 0.05$ ).

### 548 3.10. Functional substitution of *CcGRXS12* in yeast *Δgrx5* mutants

549 In yeast, *ScGRX5* was characterised to carry out the Fe-S cluster assembly mechanism  
550 (Rodriguez-Manzanaque et al., 2002). The role of plant GRX in Fe-S cluster assembly  
551 mechanism was studied through yeast *Δgrx5* complementation studies (Bandyopadhyay et al.,  
552 2008). To examine whether *CcGRXS12* substituted the function role of *ScGRX5* in yeast,  
553 yeast *Δgrx5* mutants were transformed with *CcGRXS12*. Analysis has shown that *CcGRXS12*  
554 could not rescue the *Δgrx5* mutants in the growth defective media (Fig.9A) and also in the  
555 media containing external oxidants (Fig.9B). Further, high level accumulation of free iron  
556 (Fig.9C) and low relative aconitase to MDH ratio (Fig.9C&D) in the *Δgrx5* mutants were not  
557 restored when *CcGRXS12* was transformed suggesting that *CcGRXS12* could not perform the  
558 function for Fe-S cluster assembly in yeast *Δgrx5* mutants.

CcGRXS12 protects plants from biotic and abiotic stresses

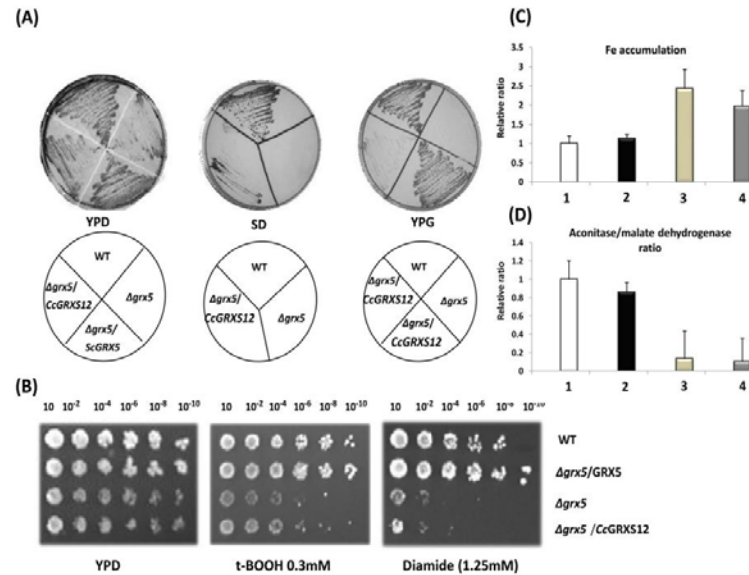

559

560 Fig.9. *CcGRXS12* complementation assay in yeast  $\Delta grx5$  mutants. (A) Analysis of the rescue  
 561 effect of *CcGRXS12* in defective media. The different yeast strains (WT- wild type;  $\Delta grx5$ ;  
 562  $\Delta grx5/GRX5$ ;  $\Delta grx5/CcGRXS12$ ) were grown in the glucose (YPD), minimal (SD) and  
 563 Glycerol (YPG) media for 3 days at 30°C. (B) Sensitivity towards oxidants were analyzed by  
 564 grown over YPD media containing t-BOOH and diamide for 3 days at 30°C. (C) Relative  
 565 accumulation of free iron in the different yeast strains. (D) Relative ratio of aconitase to  
 566 malate dehydrogenase in different yeast strains. In C & D, 1, 2, 3, 4 represent yeast strains:  
 567 wild type,  $\Delta grx5$ ,  $\Delta grx5/GRX5$ ;  $\Delta grx5/CcGRXS12$ , respectively.

568 **4. Discussion**

569 In this work, we detected the transcript accumulation of a chloroplastic class I GRX gene  
 570 belonging to S12 subgroup (*CcGRXS12*) when *Capsicum chinense* plants were infected with  
 571 compatible (PMMoV-I) and incompatible (PMMoV-S) plant virus. The increased  
 572 accumulation of *CcGRXS12* during the viral infection and also during the cold treatment of  
 573 the plants (data not shown) has shown that this protein could potentially play vital roles  
 574 during the viral infection and other abiotic stress conditions. Based on the thermodynamic  
 575 property analyzed for the PtGRXS12 protein, Eariler studies suggested that this protein has  
 576 the tendency to accumulate during GSH-mediated mild oxidative stress conditions in plants  
 577 and also during the glutathionylation process in *Arabidopsis* plants (Courturier et al., (2009a;  
 578 Dixon et al., 2005; Zaffagnini et al., 2012). PMMoV-I infection and cold treatment induces  
 579 oxidative stress condition in plants and perturb the GSH redox status in the cells (Hakmaoui,  
 580 et al., 2012; Kumar et al., 2016). The differential expression of *CcGRXS12* gene during the  
 581 PMMoV-I infection and cold stress condition in capsicum plants may be attributed to its role  
 582 in GSH mediated oxidative stress.

CcGRXS12 protects plants from biotic and abiotic stresses

583 CSYS active site of GRX (GRXS12) has been reported in yeast, plants and insect but none  
584 from prokaryotes and primitive photosynthetic organisms (*Chlamydomonas reinhardtii*)  
585 suggesting its definite functions in the higher organisms. *In vitro* oxidoreductase activity  
586 tested for the CcGRXS12 shows that it could reduce the GSH-disulphides formed in the HED  
587 assay similar to that of poplar PtGRXS12 (Couturier et al., 2009b), however, the catalytic  
588 efficiency of the CcGRXS12 was found to be 10 times less efficient than PtGRXS12 (Fig  
589 1B). The deglutathionylation property possessed by the GRXS12 proteins are important for  
590 the regeneration of the antioxidant enzymes such as MSRB1 (Vieira Dos Santos et al., 2007)  
591 and PrxII protein (Gama et al., 2008) and helps to maintain the redox poise of the plant cells.  
592 In the chloroplast of plant cells, class I GRX (C5/S12) and class II GRXs (S14-S17) co-exist  
593 and class I GRXs reduce the substrates by utilizing the reducing equivalents from GSH while  
594 class II GRX (GRXS14) utilize reducing equivalents from FTR. Thus the presence of  
595 GRXS12 protein has multiple functions in the plant system where GSH plays important role.

#### 596 **4.1. CcGRXS12 role in hormonal pathway activation**

597 As GRXs are abundant in the plant genome, the functional role of the isolated gene was  
598 studied in relation to plant-pathogen interaction by over-expressing it in *N.benthamiana*  
599 domin plants. Members of the TRX family protein (NtTRXh3) was reported to reduce the  
600 multiplication and pathogenicity of TMV and CMV in tobacco plants which was  
601 accompanied with the activation of SAR defence related PR genes (Sun et al., 2010). In order  
602 to comprehend, if *CcGRXS12* has any molecular role in the activation of systemic acquired  
603 resistance (SAR) mechanism, SA-, JA/ET-, and auxin induced GST transcripts, were  
604 analyzed in different transgenic plants. *CcGRXS12* over-expressing lines did not show  
605 difference in PR transcript accumulation compared to *GFP* expressing plants at the early  
606 stage of plant growth or infection (i.e., 7 dpi). However, at 28 dpi, high levels of SA-pathway  
607 PR transcripts were accumulated in the mock control lines of *CcGRXS12* targeted to  
608 chloroplast (*Nb:GRX* and *Nb:GRX-GFP* lines) (Fig.6B). Although higher accumulation of PR  
609 proteins were reported during the senescent stage (Obregon et al., 2001) in tobacco plants, the  
610 increased accumulation of SA-regulated PR proteins observed in the *CcGRXS12* transgenic  
611 plants appears to be related with the expression of *CcGRXS12* targeted to chloroplast.  
612 Moreover, mRNA accumulation corresponding to PR was not detected in the *N. benthamiana*  
613 plants expressing free *GFP* at that stage of development. Further the analysis of the defense  
614 marker transcripts shows that over-expression of *CcGRXS12* in chloroplast (*Nb:GRX* and  
615 *Nb:GRX-GFP* lines) suppress the JA/ET and GST transcript in the PMMoV-I infected lines.  
616 Earlier reports have shown that SA pathway activation suppresses the JA responsive genes  
617 through the induction of GRXs which interacts with the transcription factors involved in the  
618 SA-JA antagonism mechanism (Zander et al., 2012; Wasternack and Hause, 2013). SA also

CcGRXS12 protects plants from biotic and abiotic stresses

619 inhibits the auxin response pathway by universally suppressing the auxin-related genes and  
620 auxin receptor genes (Wang et al., 2007; Kong et al., 2020). The results described herein are  
621 in accordance with those observed for *Arabidopsis* GRX480, that when ectopically expressed  
622 in *Arabidopsis* enhanced the expression of SA-inducible marker genes while inhibited the  
623 expression of JA-regulated genes (Nadamukong et al., 2007). Viral accumulation was  
624 inhibited in the truncated GRX (*Nb:Δ2MGRX-GFP*) lines, but the SA- pathway activation  
625 and suppression of JA/ET pathway in the infected lines were not observed in these lines. This  
626 shows that apart from SAR activation, *CcGRXS12* could use other unknown mechanism for  
627 viral inhibition. Activation of SA- pathway related transcripts in the mock control plants; and  
628 SA-mediated JA/ET antagonism mechanism found in the infected lines of *Nb:GRX* and  
629 *Nb:GRX-GFP* show that the presence of *CcGRXS12* in the chloroplast is necessary for  
630 mediating this process as it is not observed in the truncated form of the *CcGRXS12* expressing  
631 line (*Nb:Δ2MGRX-GFP*) and free *GFP* expressing line (*Nb:GFP*). Quite possibly,  
632 *CcGRXS12* may activate the SA-pathway genes either by (i) promoting the SA- biosynthesis  
633 inside the chloroplast (or) (ii) affect the redox status of proteins (or) transcription factors  
634 involved in the transcription of SA- pathway genes thereby mediating the SA-/JA/ET  
635 antagonism in virus infected plants. GRXs are reported to synthesis phytohormones inside the  
636 plants. In rice, over expression of the *OsGRX6* increases the cytokinin and gibberellic acid  
637 levels in the plants (El-Kereamy et al., 2015; Sharma et al., 2013) by activating the  
638 phytohormonal pathway synthesizing genes. Its also noteworthy in *Arabidopsis*, the activity  
639 of GCL, a key enzyme involved in the SA biosynthesis in chloroplast is affected by the redox-  
640 dependent post-translational modification (Hothorn et al., 2006; Hicks et al.,2007). So it's of  
641 future interest whether *GRXS12* contribute to SA biosynthesis within the chloroplast by  
642 modifying the SA biosynthetic pathway genes.

#### 643 **4.2. Over-expression of *CcGRXS12* inhibits viral accumulation:**

644 When the transgenic plants were infected with PMMoV-I, no difference in viral disease  
645 symptom was observed at early stage of infection among the *GFP* and *CcGRXS12* over-  
646 expressing lines. However, recovery of the plants was more obvious in the *CcGRXS12* over-  
647 expressing lines at later stages of infection (28 dpi). At early stage of infection (7 dpi), no  
648 difference in the level of virus accumulation between the *CcGRXS12* over-expressing lines  
649 and the free *GFP* expressing line, while at the late stage of infection, over-expression of  
650 *CcGRXS12* inhibited the viral accumulation when compared to the transgenic *GFP* control  
651 (Fig. 4A,B&C). Reduced accumulation of virus in the *Nb:GRX-GFP* expressing line shows  
652 that the effect was dose dependent as *CcGRXS12* expression was found to be 10 times higher  
653 in this transgenic line (Fig.4C). The viral suppression is independent of *CcGRXS12*  
654 localization, as *CcGRXS12* targeted to the cytoplasm also inhibited viral accumulation similar

CcGRXS12 protects plants from biotic and abiotic stresses

655 to the lines wherein *CcGRXS12* was targeted to chloroplast. Protoplast infection studies  
656 showed that *CcGRXS12* and its derivative expressions are not inhibiting the viral replication.  
657 This, data is in variance with the previous reports of Auwerx et al., (2009), where it was  
658 shown that the replication of HIV was inhibited by the expression of glutaredoxin-1 in the  
659 mammalian cell system. Montes-Casado et al., (2010) have shown that the reduction of  
660 PMMoV-I virus accumulation was due to a lower number of infected cells in the systemic  
661 leaves of the *CcGRXS12* transgenic plants. Hakmaoui et al., (2012) have shown that tobacco  
662 plants infected with PMMoV-I virus recovered at late stage (28 dpi) of infection by up  
663 regulating the expression of super oxide dismutase and maintaining the adequate level of  
664 peroxiredoxins which are the key antioxidants of the cell. Increased ROS accumulation and  
665 decline in antioxidants are prerequisite for the establishment and spread of virus (Clarke et al.,  
666 2002; Hakmaoui et al., 2012). During virus invasion, plants use antioxidant machinery to  
667 bring down the oxidative stress condition under control. Virus invasion induced the  
668 expression of Glutathione-S-Transferase (GST) to control the oxidative stress condition  
669 (Chen et al., 2013; Xu et al., 2013; Pavankumar et al., 2017; Skopelitou et al., 2015). At 28  
670 dpi, the expression of auxin induced glutathione-S-transferase (GST) (pCNT103) was  
671 lowered in the infected and recovered leaves *CcGRXS12* and its derivatives expressing line  
672 while in the free *GFP* expressing lines it was at high level. The reduced accumulation of  
673 pCNT103 transcripts in the symptomatic and asymptomatic leaves of *CcGRXS12* expressing  
674 lines showed that the protein (*CcGRXS12*) enhances ROS -scavenging activity in the  
675 *CcGRXS12* over expressing line and thus limit the virus induced oxidative stress condition.  
676 It's note worthy to mention that *AtGRXS12* could regenerate PrxII and MSR B antioxidants in  
677 Arabidopsis (Vieira Dos Santos et al., 2007 & Gama et al., 2008). Individual GRXs have  
678 different regulatory roles on ROS homeostasis. Over expression of *ROXYI* GRX accumulate  
679 higher ROS content whereas *ROXYI8/GRXS13* over expression reduces the ROS  
680 accumulation (Wang et al.,2009; La Camera et al., 2011). Our *in vitro* abiotic stress tolerance  
681 assays also shows that *CcGRXS12* over expressing lines are found to be resistant against  
682 oxidative stress conditions caused by paraquat and H<sub>2</sub>O<sub>2</sub>. Our combined studies have shown  
683 that the protein could able to protect the plants from oxidative stress condition at the time of  
684 pathogen attack.

#### 685 **4.3. *CcGRXS12* maintains the redox status of the plant cells**

686 Redox status of the cell is sensed and signalled inside the cells by the redox carrier molecules  
687 (Ascorbate, Glutathione & Pyridine nucleotides) in oxidized and reduced forms. The inter  
688 conversion of the redox carrier molecules between the reduced or oxidized forms as ascorbate  
689 (ASC,DHA), glutathione (GSH, GSSG) and pyridine nucleotides (NAD(P)<sup>+</sup>, NAD(P)H)  
690 depends on the cellular redox environment of the cell. *N.benthamiana* plants infected with



CcGRXS12 protects plants from biotic and abiotic stresses

691 PMMoV-I virus, shift the redox carrier molecules (ASC,DHA; GSH,GSSG) more towards  
692 oxidized condition (Hakamoui et al., 2012). In our work, we have found that PMMoV-I  
693 infection of *N. benthamiana* transgenic lines increase the PNs level by shifting PN towards  
694 reduced condition as the levels of NADH and NADPH were found to be significantly higher  
695 in the PMMoV-I infected plants than in the mock-inoculated control plants at 28 dpi (Fig.7).  
696 Increase in PN contents increased during plant's stress condition improves plants tolerance to  
697 oxidative stresses created by biotic and abiotic stresses (Dutilleul et al., 2005; Pétriacq et al.,  
698 2012; Ogawa et al., 2016; Awasthi et al., 2019; Zhao et al., 2019). Among the PNs analyzed,  
699 increase in NADH level showed 4-8 folds in the PMMoV-I infected plants which shows that  
700 NADH is a good marker for PMMoV-I infection. Many studies also imply that increases in  
701 NADH content is a mandatory process during biotic and abiotic stress-related defence  
702 mechanisms (Ishikawa et al., 2009; Pétriacq et al., 2016, 2012; Ogawa et al., 2009).

703 Noctor, (2006) have proposed that reduced form of PNs produced in the cells are utilized by  
704 the NAD(P)H consuming enzymes which are involved in the synthesis of ROS and RNS in  
705 the cell which may act as a signalling molecule for the plant defence mechanism. Increase in  
706 NADH content in the PMMoV-I infected and recovered plant leaves produces an imbalance  
707 in the NADH/NAD<sup>+</sup> that triggers the production of ROS (Millar et al., 2001) or the regulation  
708 of cellular antioxidant systems (Dutilleul et al., 2003). Ogawa et al., (2016) have shown that  
709 *Arabidopsis* KO-*nudx6/7* mutants which accumulates high level of NADH are accompanied  
710 with increased biotic and abiotic stress tolerance. Increase in NADH in these mutant lines  
711 brings biotic/abiotic stress tolerance through the expression of biotic and abiotic stress  
712 responsive genes. The genes positively correlated with the increased NADH level belongs to  
713 SA pathway (PR1, PR5), JA/ET pathway genes (PDF1.2), oxidoreductase and post-  
714 translational modifying (PTM) enzymes. The genes activated by the increased NADH content  
715 differed from H<sub>2</sub>O<sub>2</sub> pathway mediated gene expressions. In our work, we found that within  
716 the infected transgenic lines, only *Nb:GRX-GFP* line showed significantly higher NADH and  
717 NADPH accumulation at 28 dpi which was accompanied with enhanced virus resistance  
718 (Fig.15) which shows that high level *CcGRXS12* expression respond to pathogen infection  
719 with increased NADH content.

#### 720 **4.4. Redox carrier molecules versus PR proteins:**

721 Many studies have correlated the phenomenon of PN accumulation and PR gene expression.  
722 Extracellular application of pyridine nucleotides induce plant resistance to pathogen (Zhang  
723 and Mou, 2009; Alferez et al., 2018; Wang et al., 2016; Sidiq et al., 2021). (Ge et al., 2007;  
724 Reducing the level of pyridine nucleotides through genetic manipulation results in the  
725 compromisation of SA pathway activation and pathogen resistance (Li et al., 2021).  
726 Nevertheless, our study has proven that *CcGRXS12*- mediated PR transcript accumulation is

CcGRXS12 protects plants from biotic and abiotic stresses

727 independent of PN accumulation as it was found that PN accumulation in the different  
728 transgenic plants and the mock-inoculated control plants are comparable but the accumulation  
729 of SA-pathway transcript was high in *Nb:GRX-GFP* line (Fig.6B). Further at 28 dpi, PN  
730 accumulation in the asymptomatic leaves were found to be lower than their infected  
731 counterparts, which is contrast with PR accumulation. Thus *CcGRXS12*- mediated PR gene  
732 expression is independent of PN levels under pathogenic and non-pathogenic conditions.

#### 733 **4.5. *CcGRXS12* in abiotic stress tolerance**

734 It has been demonstrated that many plant GRX proteins protect the plants from oxidative  
735 stress conditions created during abiotic stress conditions (Wu et al., 2012; Wu et al., 2017).  
736 Treatment of plants with paraquat generates ROS in chloroplasts due to auto oxidation of  
737 paraquat radicals generated by electrons from the reaction center of PSI (Taiz and Zeiger,  
738 2010; Krieger-Liszky et al., 2011), thereby inducing oxidative damage. *CcGRXS12* over  
739 expression enhances the plants tolerance against oxidative stress conditions caused by H<sub>2</sub>O<sub>2</sub>  
740 and paraquat irrespective of the protein localization. Different mechanism of GRX- mediated  
741 ROS scavenging mechanisms are proposed; GRXs detoxify ROS toxicity through lowering  
742 the superoxide ion radicals accumulation (Laporte et al., 2012; Ning et al., 2018) or by  
743 regenerating the antioxidant proteins (Rouhier et al., 2005; Wu et al., 2012; Guo et al., 2010;  
744 Sharma et al., 2013; Morita et al., 2015). Apart from this, GRXs are reported to scavenge  
745 ROS through interaction with transcription factors involved in the stress- related genes  
746 expression (Hu et al., 2015; Wu et al., 2012) or by protecting the thiol groups on the enzymes  
747 (Morita et al., 2015). The mechanisms through which *CcGRXS12* induce abiotic stress  
748 tolerance in *N. benthamiana* have not been analyzed in this work, however it is plausible that  
749 the over-expression of *CcGRXS12* could activate the expression of genes involved in the  
750 antioxidant mechanisms either in the cytoplasm or the chloroplast. Earlier, *in vitro* studies  
751 have reported that *AtGRXS12* could able to regenerate PrxII and MSR B which are the major  
752 antioxidants in plant system (Vieira Dos Santos et al., 2007 & Gama et al., 2008).

#### 753 **4.6. *CcGRXS12* in Fe-S cluster assembly mechanism**

754 Fe-S cluster containing proteins were found to be abundant in the chloroplast and  
755 mitochondria and also throughout the cell (Przybyla-Toscano et al., 2018). Involvement of  
756 GRX5 protein in Fe-S cluster assembly was first studied in yeast where the deletion of *GRX5*  
757 caused deficient in the synthesis of Fe-S cluster containing proteins and further leads to the  
758 accumulation of iron which increases the sensitivity of yeast cells towards oxidative stress  
759 conditions (Rodriguez-Manzanique et al., 1999, 2002). Many plant *GRXs* substitute the  
760 function of *GRX5* in yeast (Cheng et al., 2006; Cheng, 2008; Bandyopadhyay et al., 2008). In  
761 our experiment, the over expression of *CcGRXS12* in yeast  $\Delta grx5$  mutant could neither restore

CcGRXS12 protects plants from biotic and abiotic stresses

762 the Fe-S enzyme activities nor suppress iron accumulation (Fig 9 C & D). Thus, *CcGRXS12*  
763 could not participate in Fe-S cluster assembly in yeast but in plants it' is still uncertain. The  
764 structural analysis of populous PtGrxS12 the closest paralog of CcGRXS12 shows that the  
765 presence of Trp at -1 position prevents the protein from Fe-S cluster assembly (Couturier et  
766 al., 2009b). However, the later studies on AtGRXC5 structure showed that apart from Trp at -  
767 1 position, amino acids at other sites are the deciding factors for the Fe-S cluster assembly  
768 mechanism (Couturier et al., 2011). Thus yeast transformation studies showed that the protein  
769 may not participate in the biogenesis of Fe-S cluster assembly or in the regulation of iron  
770 homeostasis in the chloroplasts.

771 In conclusion over expression of *CcGRXS12* in *N.benthamiana* plants protect the plants from  
772 the oxidative stress conditions created during the biotic and abiotic stresses. CcGRXS12  
773 protein possesses oxidoreductase activity as it could reduce the disulfide bonds formed  
774 between GSH and substrate during the HED assay but not able to participate in Fe-S cluster  
775 assembly mechanism. The involvement of this protein in multiple stresses warrants further  
776 investigation so that it could be exploited for engineering crops with improved stress  
777 tolerance.

778

#### 779 **Author Contributions**

780 RMS conceived,designed and performed the experiment; wrote the article SVR revised the  
781 manuscript and offered critical comments. ST, ZS, AKB contributed in revising the  
782 manuscript.

#### 783 **Funding**

784 This work was supported by CSIC-JAE programme during RMS pre-doctoral studies.

#### 785 **Declaration of competing interest**

786 None

#### 787 **Acknowledgements**

788 My first thanks to Dr. Maite Serra who was mentor for RMS and also providing me space for  
789 conducting doctoral research studies. I thank Dr. Isabel Garcia Luque for her support and  
790 knowledge during my research studies. We thank Dr.Enrique for providing the yeast strains  
791 and also carry out yeast expression studies. I personally thank Dr. Victoriana Palpuestra for  
792 helping me to analyze pyridine nucleotide.

CcGRXS12 protects plants from biotic and abiotic stresses

## 793 **Appendix**

### **References:**

Akbar, S., Wei, Y., Yuan, Y. et al. (2020) Gene expression profiling of reactive oxygen species (ROS) and antioxidant defense system following Sugarcane mosaic virus (SCMV) infection. *BMC Plant Biol* 20, 532.

Alferez FM, Gerberich KM, Li JL, Zhang Y, Graham JH, Mou Z. (2018). Exogenous Nicotinamide Adenine Dinucleotide Induces Resistance to Citrus Canker in Citrus. *Front Plant Sci.* 9:1472.

Alonso, E., Garcia-Luque, I., de la Cruz, A., Wicke, B., Avila-Rincon, M.J., Serra, M.T., Castresana, C., and Diaz-Ruiz, J.R. (1991). Nucleotide sequence of the genomic RNA of pepper mild mottle virus, a resistance-breaking tobamovirus in pepper. *J. Gen. Virol.* 72:2875-84.

Auwerx, J., Isacson, O., Söderlund, J., Balzarini, J., Johansson, M., and Lundberg M. (2009). Human glutaredoxin-1 catalyzes the reduction of HIV-1 gp120 and CD4 disulfides and its inhibition reduces HIV-1 replication. *The International Journal of Biochemistry & Cell Biology.* 41: 1269-1275.

Awasthi, J.P., Saha, B., Panigrahi, J., Yanase, E., Koyama, H., Panda, S.K., (2019). Redox balance, metabolic fingerprint and physiological characterization in contrasting North East Indian rice for Aluminum stress tolerance. *Sci Rep* 9; 8681.

Balint-Kurti P. (2019). The plant hypersensitive response: concepts, control and consequences. *Mol Plant Pathol.* 20: 1163-1178.

Bandyopadhyay, S., Gama, F., Molina-Navarro, M.M., Gualberto, J.M., Claxton, R., Naik, S.G., Huynh, B.H., Herrero, E., Jacquot, J.P., Johnson, M.K., Rouhier, N. (2009). Chloroplast monothiol glutaredoxins as scaffold proteins for the assembly and delivery of [2Fe-2S] clusters. *EMBO J.* 27 :1122–1133.

Bozbuga, R., Arpacı, B.B., Uluisik, S., Guler, P.G., Yildiz, H.N., Ates, S.Y., (2022). Genetic Modification of Plant Hormones Induced by Parasitic Nematodes, Virus, Viroid, Bacteria, and Phytoplasma in Plant Growing. *Plant Hormones - Recent Advances, New Perspectives and Applications IntechOpen.* DOI: 10.5772/intechopen.102721

Chen, I. H., Chiu, M. H., Cheng, S. F., Hsu, Y. H., Tsai, C. H. (2013). The glutathione transferase of *Nicotiana benthamiana* NbGSTU4 plays a role in regulating the early replication of Bamboo mosaic virus. *New Phytol.* 199, 749–757.

CcGRXS12 protects plants from biotic and abiotic stresses

Chenchik, A., Zhu, Y.Y., Diatchenko, L., Li, R., Hill, J., and Siebert, P.D. (1998). Gene cloning and analysis by RT-PCR. Siebert P., Larrick J., editors. Natick, MA: BioTechniques Books, 305-319.

Cheng, N.H. (2008). AtGRX4, an Arabidopsis chloroplastic monothiol glutaredoxin, is able to suppress yeast grx5 mutant phenotypes and respond to oxidative stress. FEBS Lett, 582: 848–854.

Cheng, N.H., Liu, J.Z., Brock, A., Nelson, R.S., and Hirschi, K.D. (2006). AtGRXcp, an Arabidopsis chloroplastic glutaredoxin, is critical for protection against protein oxidative damage, J. Biol. Chem. 281: 26280–26288.

Chomczynski, P., and Sacchi, N. (1987). Single-step method of RNA isolation by acid guanidinium thiocyanate-phenol-chloroform extraction. Anal. Biochem. 162: 156-159.

Clarke, S.F., Guy, P.L, Burritt D.J, Jameson P.E. (2002) Changes in the activities of antioxidant enzymes in response to virus infection and hormone treatment Physiologia Plantarum. 114; 157–164.

Couturier, J., Didierjean, C., Jacquot, J.P., and Rouhier, N. (2010). Engineered mutated glutaredoxins mimicking peculiar plant classIII glutaredoxins bind iron-sulfur centers and possess reductase activity. Biochem.Biophys.Res. Commun. 403, 435–441.

Couturier, J., Jacquot, J.P., and Rouhier, N. (2009a). Evolution and diversity of glutaredoxins in photosynthetic organisms. Cellular and Molecular Life Sciences. 66: 2539–2557.

Couturier, J., Koh, C.S., Zaffagnini, M., Winger, A.M., Gualberto, J.M., Corbier, C., Decottignies, P., Jacquot, J.P., Lemaire, S.D., Didierjean, C., and Rouhier, N. (2009b). Structure–function relationship of the chloroplastic glutaredoxin S12 with an atypical WCSYS active site. J. Biol. Chem. 284: 9299–9310.

Couturier, J., Stroher, E., Albetel, A.N., Roret, T., Muthuramalingam, M., Tarrago, L., Seidel, T., Tsan, P., Jacquot, J.P., Johnson, M.K., Dietz, K.J., Didierjean, C., and Rouhier, N. (2011). Arabidopsis chloroplastic glutaredoxin C5 as a model to explore the molecular determinants for iron-sulfur cluster binding into glutaredoxins. J. Biol. Chem. 286: 27515–27527.

Despres, C., De Long, C., Glaze, S., Liu, E., Fobert, P. R. (2000). The Arabidopsis NPR1/NIM1 protein enhances the DNA binding activity of a subgroup of the TGA family of bZIP transcription factors. Plant Cell 12; 279–290.

Dixon, J., Durrheim, K., Tredoux, C. (2005). Beyond the optimal contact strategy: a reality check for the contact hypothesis. Am Psychol. 60(7):697-711.

CcGRXS12 protects plants from biotic and abiotic stresses

Droog, F., Hooykaas, P., Van Der Zaal, B.J. (1995). 2,4-Dichlorophenoxyacetic Acid and Related Chlorinated Compounds Inhibit Two Auxin-Regulated Type-III Tobacco Glutathione S-Transferases. *Plant Physiol.* 107(4):1139-1146.

Dutilleul, C., Lelarge, C., Prioul, J.L., De Paepe, R., Foyer, C.H., Noctor, G. (2005). Mitochondria-driven changes in leaf NAD status exert a crucial influence in the control of nitrate assimilation and the integration of carbon and nitrogen metabolism. *Plant Physiol* 139: 64–78.

Dutilleul, C., Driscoll, S., Cornic, G., De Paepe, R., Foyer, C.H., Noctor, G. (2003). Tobacco leaves require functional mitochondrial complex I for optimal photosynthetic performance in photorespiratory conditions and during transients. *Plant Physiol.* 131: 264–275.

Ehrary, A., Rosas, M., Carpinelli, S., Davalos, O., Cowling, C., Fernandez, F., Escobar, M. (2020). Glutaredoxin AtGRXS8 represses transcriptional and developmental responses to nitrate in *Arabidopsis thaliana* roots. *Plant Direct.* 4 (6), e00227.

El-Kereamy A., Bi, Y.M, Mahmood, K., Ranathunge, K., Yaish, M.W., Nambara, E., Rothstein, S.J. (2015). Overexpression of the CC-type glutaredoxin, OsGRX6 affects hormone and nitrogen status in rice plants. *Front Plant Sci.* 6:934.

Emanuelsson, O., Nielsen, H., von Heijne, G. (1999). ChloroP, a neural network-based method for predicting chloroplast transit peptides and their cleavage sites. *Protein Sci.* 8(5):978-984.

Fish, W.W. (1988). Rapid colorimetric micromethod for the quantitation of complexed iron in biological samples. *Methods Enzymol.* 158: 357–364.

Fodor, J., Gullner, G., Adam, A.L., Barna, B., Komives, T., Kiraly, Z. (1997). Local and Systemic Responses of Antioxidants to Tobacco Mosaic Virus Infection and to Salicylic Acid in Tobacco (Role in Systemic Acquired Resistance). *Plant Physiol.* 114(4):1443-1451.

Gama F., Bréhélin C., Gelhaye E., Meyer Y., Jacquot J. P., Rey P., et al. (2008). Functional analysis and expression characteristics of chloroplastic Prx IIE. *Plant Physiol.* 133, 599–610.

Garcia-Luque, I., Serra, M.T., Alonso, E., Wicke, B., Ferrero, M.L., and Diaz-Ruiz, J.R. (1990). Characterization of a Spanish Strain of Pepper Mild Mottle Virus (PMMV-S) and its Relationship to Other Tobamoviruses. *J Phytopathology* 129: 1-8.

Ge, X., Li, G.-J., Wang, S.-B., Zhu, H., Zhu, T., Wang, X., Xia, Y. (2007). AtNUDT7, a negative regulator of basal immunity in *Arabidopsis*, modulates two distinct defense response pathways and is involved in maintaining redox homeostasis. *Plant Physiol.* 145: 204–215.

CcGRXS12 protects plants from biotic and abiotic stresses

Gibon, Y., Blaesing, O. E., Hannemann, J., Carillo, P., Höhne, M., Hendriks, J. H. M. (2004). A robot-based platform to measure multiple enzyme activities in *Arabidopsis* using a set of cycling assays: comparison of changes of enzyme activities and transcript levels during diurnal cycles and in prolonged darkness. *Plant Cell* 16: 3304–3325.

Gilardi, P., García-Luque, I., Serra, M.T. (1998). Pepper mild mottle virus coat protein alone can elicit the *Capsicum* spp. L3 gene-mediated resistance. *Mol. Plant Microbe Interact.* 11: 1253-1257.

Guo, Y., Huang, C., Xie, Y., Song, F., and Zhou, X. (2010). A tomato glutaredoxin gene SIGRX1 regulates plant responses to oxidative, drought and salt stresses. *Planta*. 232(6): 1499-1509.

Gutsche, N., Holtmannspötter, M., Maß, L., O'Donoghue, M., Busch, A., Lauri, A., Schubert, V., Zachgo, S. (2017). Conserved redox-dependent DNA binding of ROXY glutaredoxins with TGA transcription factors. *Plant Direct*. 1(6):e00030.

Hajirezaei, M-R., Peisker, M., Tschiersch, H., Palatnik, J.F., Valle, E.M., Carrillo, N., Sonnewald, U. (2002). Small changes in the activity of chloroplastic NADP<sup>+</sup>-dependent ferredoxin oxidoreductase lead to impaired plant growth and restrict photosynthetic activity of transgenic tobacco plants. *Plant J.* 29: 281-293.

Hakmaoui, A., Pérez-Bueno, M.L., García-Fontana, B., Camejo, D., Jiménez, A., Sevilla, F., Barón, M. (2012) Analysis of the antioxidant response of *Nicotiana benthamiana* to infection with two strains of Pepper mild mottle virus. *J Exp Bot.* 63:5487-5496.

Herrera-Vásquez, A., Carvallo, L., Blanco, F. Tobar, M., Villarroel-Candia, E., Vicente-Carbajosa, J., Salinas, P., Holuigue, L. (2015). Transcriptional Control of Glutaredoxin GRXC9 Expression by a Salicylic Acid-Dependent and NPR1-Independent Pathway in *Arabidopsis*. *Plant Mol Biol Rep* 33: 624–637.

Hicks, L.M., Cahoon, R.E., Bonner, E.R., Rivard, R.S., Sheffield, J., Jez, J.M. (2007) Thiol-based regulation of redox-active glutamate-cysteine ligase from *Arabidopsis thaliana*. *Plant Cell* 19: 2653–2661.

Holmgren, A., Aslund F. (1995). "Glutaredoxin". *Methods Enzymol.* 252: 283–292.

Hothorn, M., Wachter, A., Gromes, R., Stuwe, T., Rausch, T., Scheffzek, K. (2006). Structural basis for the redox control of plant glutamate cysteine ligase. *J Biol Chem* 281: 27557–27565.

CcGRXS12 protects plants from biotic and abiotic stresses

Hou, J., Sun, Q., Li, J., Ahammed, G.J., Yu, J., Fang, H., et al (2019). Glutaredoxin S25 and its interacting TGACG motif-binding factor TGA2 mediate brassinosteroid-induced chlorothalonil metabolism in tomato plants. *Environ Pollut.* 255:113256.

Hu, Y., Wu, Q., Sprague, S.A., Park, J., Oh, M., Rajashekar, C.B., Koiwa, H., Nakata, P.A., Cheng, N., Hirschi, K.D., White, F.F., Park, S., (2015). Tomato expressing Arabidopsis glutaredoxin gene AtGRXS17 confers tolerance to chilling stress via modulating cold responsive components. *Hort. Res.* 2, 15051.

Ishikawa, K., Ogawa, T., Hirose, E., Nakayama, Y., Harada, K., Fukusaki, E., Yoshimura, K., Shigeoka, S. (2009) Modulation of the poly(ADP-ribose)ation reaction via the Arabidopsis ADP-ribose/NADH pyrophosphohydrolase, AtNUDX7, is involved in the response to oxidative stress. *Plant Physiol.* 151: 741–754.

Ismayil, A., Haxim, Y., Wang, Y., Li, H., Qian, L., Han, T., Chen, T., Jia, Q., Yihao Liu, A., Zhu, S., Deng, H., Gorovits, R., Hong, Y., Hanley-Bowdoin, L., Liu, Y. (2018). Cotton Leaf Curl Multan virus C4 protein suppresses both transcriptional and post-transcriptional gene silencing by interacting with SAM synthetase. *PLoS Pathog.* 29: e1007282.

Kong, X., Zhang, C., Zheng, H., Sun, M., Zhang, F., Zhang, M., Cui, F., Lv, D., Liu, L., Guo, S., Zhang, Y., Yuan, X., Zhao, S., Tian, H., Ding, Z. (2020). Antagonistic Interaction between Auxin and SA Signaling Pathways Regulates Bacterial Infection through Lateral Root in Arabidopsis. *Cell Rep.* 25:108060.

Krieger-Liszkay, A., Trösch, M., Krupinska, K. (2015). Generation of reactive oxygen species in thylakoids from senescing flag leaves of the barley varieties Lomerit and Carina. *Planta* 241:1497–1508.

Kumar, D., Hazra, S., Datta, R., Chattopadhyay, S. (2016). Transcriptome analysis of Arabidopsis mutants suggests a crosstalk between ABA, ethylene and GSH against combined cold and osmotic stress. *Sci. Rep.* 6:36867.

La Camera, S., L'haridon, F., Astier, J., Zander, M., Abou-Mansour, E., Page, G., Thurow, C., Wendehenne, D., Gatz, C., Me'traux, J.P., and Lamotte, O. (2011). The glutaredoxin AtGrxS13 is required to facilitate Botrytis cinerea infection of Arabidopsis thaliana plants. *Plant J.* 68: 507–519.

Laemmli, U.K. (1970). Cleavage of structural proteins during the assembly of the head of bacteriophage T4. *Nature* 227: 680-685.



CcGRXS12 protects plants from biotic and abiotic stresses

Laporte, D., Olate, E., Salinas, P., Salazar, M., Jordana, X., and Holuigue, L. (2012). Glutaredoxin GRXS13 plays a key role in protection against photo-oxidative stress in *Arabidopsis*. *J Exp Bot.* 63: 503–515.

Li, N., Muthreich, M., Huang, L.J., Thurow, C., Sun, T., Zhang, Y., Gatz, C. (2019). TGACG-BINDING FACTORS (TGAs) and TGA-interacting CC-type glutaredoxins modulate hyponastic growth in *Arabidopsis thaliana*. *New Phytol.* 221(4):1906–1918.

Li, F., Wang, A. (2019). RNA-targeted antiviral immunity: more than just RNA silencing. *Trends Microbiol* 27: 792 – 805

Li, S., Ding, H., Deng, Y., Zhang, J. (2021). Knockdown of quinolinate phosphoribosyl transferase results in decreased salicylic acid-mediated pathogen resistance in *Arabidopsis thaliana*. *International Journal of Molecular Sciences.* 22(16):8484.

Liang, P., and Pardee, A. B. (1992). Differential display of eukaryotic messenger RNA by means of the polymerase chain reaction. *Science* 257: 967-71.

Lu, Y. (2018). Assembly and Transfer of Iron–Sulfur Clusters in the Plastid. *Front. Plant Sci.* 9:336.

Ma, K.W., Ma, W. (2016) Phytohormone pathways as targets of pathogens to facilitate infection. *Plant Mol Biol.* 91:713–725.

Malik, W.A., Wang, X., Wangm X., Shu, N., Cui, R., Chen, X., Wang, D., Lu, X., Yin, Z., Wang, J., Ye, W. (2020). Genome-wide expression analysis suggests glutaredoxin genes response to various stresses in cotton. *Int J Biol Macromol.* 153:470-491.

Marmonier, A., Velt, A., Villeroy, C. Rustenholz, C., Chesnais, Q., Brault, V. (2022). Differential gene expression in aphids following virus acquisition from plants or from an artificial medium. *BMC Genomics.* 23, 333.

Millar, A.H., Sweetlove, L.J., Giege, P., and Leaver, C.J. (2001). Analysis of the *Arabidopsis* mitochondrial proteome. *Plant Physiol.* 127: 1711–1727.

Molina-Navarro, M.M., Casas, C., Piedrafita, L., Bellí, G., and Herrero, E. (2006). Prokaryotic and eukaryotic monothiol glutaredoxins are able to perform the functions of Grx5 in the biogenesis of Fe/S clusters in yeast mitochondria. *FEBS Lett.* 580: 2273–2280.

Montes-Casado, N., Tena F., Ramasamy, S., Bonilla-Martínez A, Cebolla, M., Pardo C, Montesinos C, García-Luque, I., Serra, M. (2010). La expresión constitutiva de una

CcGRXS12 protects plants from biotic and abiotic stresses

glutaredoxina (GRX) de *C. chinense* en plantas de *Nicotiana benthamiana* conlleva una reducción en la acumulación viral de PMMoV-I. Resúm. X Reunión de Biología Molecular de Plantas. Valencia. pág 175.

Morita, S., Yamashita, Y., Fujiki, M., Todaka, R., Nishikawa, Y., Hosoki, A., Yabe, C., Nakamura, J., Kawamura, K., Suwastika, I.N., Sato, M.H., Masumura, T., Ogihara, Y., Tanaka, K., Satoh, S. (2015). Expression of a rice glutaredoxin in aleurone layers of developing and mature seeds: subcellular localization and possible functions in antioxidant defense. *Planta* 242, 1195–1206.

Ndamukong, I., Abdallat, A.A., Thurow, C., Fode, B., Zander, M., Weigel, R., Gatz, C. (2007). SA-inducible *Arabidopsis* glutaredoxin interacts with TGA factors and suppresses JA-responsive PDF1.2 transcription. *Plant J.* 50: 128–139.

Ning, X., Sun, Y., Wang, C., Zhang, W., Sun, M., Hu, H., Liu, J., Yang, L. (2018). A Rice CPYC-Type Glutaredoxin OsGRX20 in Protection against Bacterial Blight, Methyl Viologen and Salt Stresses. *Front. Plant Sci.* 9; 111.

Noctor, G. (2006). Metabolic signalling in defence and stress: the central roles of soluble redox couples. *Plant Cell Environ.* 29:409-425.

Obregón, P., Martín, R., Sanz, A. and Castresana, C. (2001). Activation of defence-related genes during senescence: a correlation between gene expression and cellular damage. *Plant Mol. Biol.* 46: 67–77.

Ogawa T., Muramoto K., Takada R., Nakagawa S., Shigeoka S., Yoshimura K. (2016). Modulation of NADH Levels by *Arabidopsis* Nudix Hydrolases, AtNUDX6 and 7, and the Respective Proteins Themselves Play Distinct Roles in the Regulation of Various Cellular Responses Involved in Biotic/Abiotic Stresses. *Plant Cell Physiol.* 57:1295–1308.

Ogawa T., Muramoto K., Takada R., Nakagawa S., Shigeoka S., Yoshimura K. (2016). Modulation of NADH Levels by *Arabidopsis* Nudix Hydrolases, AtNUDX6 and 7, and the Respective Proteins Themselves Play Distinct Roles in the Regulation of Various Cellular Responses Involved in Biotic/Abiotic Stresses. *Plant Cell Physiol.* 57:1295–1308.

Palukaitis, P., Yoon, J-Y. (2020). R gene mediated defense against viruses, *Current Opinion in Virology.* 45: 1-7.

Pavan Kumar, B.K., Kanakala, S., Malathi, V.G., Gopal, P., Usha, R. (2017). Transcriptomic and proteomic analysis of yellow mosaic diseased soybean. *J. Plant Biochem. Biotechnol.* 26, 224–234.

CcGRXS12 protects plants from biotic and abiotic stresses

Pétriaccq, P., de Bont, L., Tcherkez, G., Gakière, B. (2013). NAD: not just a pawn on the board of plant-pathogen interactions. *Plant Signal Behav.* 8(1): e22477.

Pétriaccq, P., de Bont, L., Hager, J., Didierlaurent, L., Mauve, C., Guérard, F., Noctor, G., Pelletier, S., Renou, J., Tcherkez, G., Gakière, B. (2012). Inducible NAD overproduction in *Arabidopsis* alters metabolic pools and gene expression correlated with increased salicylate content and resistance to Pst-AvrRpm1. *Plant J.* 70:650-665.

Pétriaccq, P., Ton, J., Patrit, O., Tcherkez, G., Gakière, B. (2016). NAD acts as an integral regulator of multiple defense layers. *Plant Physiol.* 172:1465-1479.

Przybyla-Toscano, J., Roland, M., Gaymard, F., Couturier, J., Rouhier, N. (2018). Roles and maturation of iron-sulfur proteins in plastids. *J Biol Inorg Chem* 23, 545–566.

Pre, M., Atallah, M., Champion, A., de Vos, M., Pieterse, C.M.J., Memelink, J. (2008). The AP2/ERF domain transcription factor ORA59 integrates jasmonic acid and ethylene signals in plant defense. *Plant Physiol.* 147: 1347–1357.

Robinson, J.B. Jr., Brent, L.G., Sumegi, B., Srere, P.A. (1987). An enzymatic approach to the study of the Krebs tricarboxylic acid cycle. In: *Mitochondria: A Practical Approach*, ed. W.M. Darley-Usmar, D. Rickwood, and M.T. Wilson, Oxford, UK: IRL Press, 153–170.

Rodriguez-Manzaneque, M.T., Ros, J., Cabisco, E., Sorribas, A., Herrero, E. (1999). Grx5 glutaredoxin plays a central role in protection against protein oxidative damage in *Saccharomyces cerevisiae*. *Mol Cell Biol.* 19: 8180–8190.

Rodríguez-Manzaneque, M.T., Tamarit, J., Bellí, G., Ros, J., Herrero, E. (2002). Grx5 is a mitochondrial glutaredoxin required for the activity of iron/sulfur clusters. *Mol Biol Cell* 13: 1109–1121.

Rouhier, N., Unno, H., Bandyopadhyay, S., Masip, L., Kim, S.K., Hirasawa, M., Gualberto, J.M., Lattard, V., Kusunoki, M., Knaff, D.B., Georgiou, G., Hase, T., Johnson, M.K., Jacquot, J.P. (2007). Functional, structural, and spectroscopic characterization of a glutathione-ligated [2Fe-2S] cluster in poplar glutaredoxin C1. *Proc Natl Acad Sci USA* 104; 7379–7384.

Ruan, M.B., Yang, Y.L., Li, K., Guo, X., Wang, B., Yu, X.L., Peng, M. (2018). Identification and characterization of drought-responsive CC-type glutaredoxins from cassava cultivars reveals their involvement in ABA signalling. *BMC Plant Biol.* 18:329.

Ruan, M-B., Yu, X-L., Guo, X., Zhao, P-J., Peng, M. (2022). Role of cassava CC-type glutaredoxin MeGRXC3 in regulating sensitivity to mannitol-induced osmotic stress dependent on its nuclear activity. *BMC Plant Biol* 22, 41.

CcGRXS12 protects plants from biotic and abiotic stresses

Ruiz del Pino, M., Moreno, A., García de Lacoba, M., Castillo-Lluva, S., Gilardi, P., Serra, M.T., García-Luque, I. (2003). Biological and molecular characterization of P101 isolate, a tobamoviral pepper strain from Bulgaria. *Arch. Virol.* 148: 2115–2135.

Sambrook, J., Fritsch, E. F., Maniatis, F. (1989). *Molecular cloning. A laboratory manual.* Cold Spring Harbor Laboratory Press. New York.

SAS Institute Inc. (2004). *What's New in SAS®9.0, 9.1, 9.1.2, and 9.1.3.* Cary, NC: SAS Institute Inc.

Sharma, R., Priya, P., Jain, M. (2013). Modified expression of an auxin-responsive rice CC-type glutaredoxin gene affects multiple abiotic stress responses. *Planta.* 238:871–884.

Skopelitou, K., Muleta, A.W., Pavli, O., Skaracis, G.N., Flemetakis, E., Papageorgiou, A. C., Labrou, N.E. (2012b). Overlapping protective roles for glutathione transferase gene family members in chemical and oxidative stress response in *Agrobacterium tumefaciens*. *Funct. Integr. Genomics* 12, 157–172.

Sidiq, Y., Nakano, M., Mori, Y., Yaeno, T., (2021). Nicotinamide effectively suppresses Fusarium head blight in wheat plants. *IJMS.* 22(6): 2968.

Stintzi, A., Heitz, T., Prasad, V., Wiedemann-Merdinoglu, S., Kauffmann, S., Geoffroy, P., Legrand M., Fritig, B. (1993). Plant 'pathogenesis-related' proteins and their role in defense against pathogens. *Biochimie.* 75 (8) :687-706.

Sun, L., Ren, H., Liu, R., Li, B., Wu, T., Sun, F., Liu, H., Wang, X., Dong, H. (2010). An h-type thioredoxin functions in tobacco defense responses to two species of viruses and an abiotic oxidative stress. *Mol Plant Microbe Interact.* 23(11); 1470–1485.

Taiz, L., Zeiger, E. (2010) *Plant Physiology.* 5th Edition, Sinauer Associates Inc., Sunderland, 782 p.

Uhrig, J.F., Huang, L.J., Barghahn, S., Willmer, M., Thurow, C., Gatz, C. (2017). CC-type glutaredoxins recruit the transcriptional co-repressor TOPLESS to TGA-dependent target promoters in *Arabidopsis thaliana*. *Biochim Biophys Acta.* 1860(2):218–226.

Van der Does, D., Leon-Reyes, A., Koornneef, A., van Verk, M. C., Rodenburg, N., Pauwels, L., Goossens, A., Körbes, A.P., Memelink, J., Ritsema, T., Van wees, S.C.M., Pieterse, C.M.J. (2013). Salicylic acid suppresses jasmonic acid signaling downstream of SCFCO11-JAZ by targeting GCC promoter motifs via transcription factor ORA59. *Plant Cell* 25, 744–761.

CcGRXS12 protects plants from biotic and abiotic stresses

Van der Zaal, E.J., Memelink, J., Mennes, A.M., Quint, A., Libbenga, K.R. (1987). Auxin-induced mRNA species in tobacco cell cultures. *Plant Mol Biol.* 10, 145–157.

Van Loon, L.C., Van Strien, E. A. (1999) The families of pathogenesis-related proteins, their activities, and comparative analysis of PR-1 type proteins. *Physiological and Molecular Plant Pathology* 55, 85–97.

Van Loon, L.C., Rep, M., Pieterse, C.M. (2006). Significance of inducible defense-related proteins in infected plants. *Annu Rev Phytopathol.* 44:135-162.

Vieira Dos Santos, C., Laugier, E., Tarrago, L., Massot, V., Issakidis-Bourguet, E., Rouhier, N, Rey, P. (2007). Specificity of thioredoxins and glutaredoxins as electron donors to two distinct classes of Arabidopsis plastidial methionine sulfoxidereductases B. *FEBS Letters* 581:4371–4376.

Vlot, A. C., Dempsey, D. A., and Klessig, D. F. (2009). Salicylic Acid, a multifaceted hormone to combat disease. *Annu. Rev. Phytopathol.* 47, 177–206.

Wang, D., Pajeroska-Mukhtar, K., Culler, A.H., Dong, X. (2007). Salicylic acid inhibits pathogen growth in plants through repression of the auxin signaling pathway. *Curr Biol.* 23;17(20):1784-90.

Wang, M.B., Masuta, C., Smith, N.A., Shimura, H. (2012). RNA silencing and plant viral diseases. *Mol Plant Microbe Interact.* 25(10):1275-85.

Wang, X., Jiang, Z., Yue, N., Jin, X., Zhang, X., Li, Z., Zhang, Y., Wang, X.B., Han, C., Yu, J., Li, D. (2021). Barley stripe mosaic virus  $\gamma$ b protein disrupts chloroplast antioxidant defenses to optimize viral replication. *EMBO J.* 16;40(16):e107660.

Wang, Z., Xing, S., Birkenbihl, R.P., and Zachgo, S. (2009). Conserved functions of Arabidopsis and rice CC-type glutaredoxins in flower development and pathogen response. *Mol Plant.* 2: 323–335.

Wang, C., Zhang, X., Mou, Z. (2016). Comparison of nicotinamide adenine dinucleotide phosphate-induced immune responses against biotrophic and necrotrophic pathogens in Arabidopsis thaliana. *Plant Signal Behav* 11: e1169358

Wasternack, C., Hause, B. (2013). Jasmonates: biosynthesis, perception, signal transduction and action in plant stress response, growth and development. An update to the 2007 review in *Annals of Botany.* *Annals of Bot.* 111 (6), 1021–1058.

CcGRXS12 protects plants from biotic and abiotic stresses

Wetter, C., Conti, M., Altschuh, D., Tabillion, R., van Regenmortel, M.H.V. (1984). Pepper mild mottle virus, a tobamovirus infecting pepper cultivars in Sicily. *Phytopathology*. 74: 405-410.

Wu, Q., Yang, J., Cheng, N., Hirschi, K-D., White, F-F., Park, S. (2017). Glutaredoxins in plant development, abiotic stress response, and iron homeostasis: From model organisms to crops. *Environmental and Experimental Botany*, 139; 91-98.

Wu, Q., Lin, J., Liu, J.-Z., Wang, X., Lim, W., Oh, M., Park, J., Rajashekar, C.B., Whitham, S.A., Cheng, N.-H., Hirschi, K.D., and Park, S. (2012). Ectopic expression of Arabidopsis glutaredoxin AtGRXS17 enhances thermotolerance in tomato. *Plant Biotechnol. J.* 10: 945–955.

Xu, Q., Ni, H., Chen, Q., Sun, F., Zhou, T., Lan, Y., Zhou, Y. (2013). Comparative proteomic analysis reveals the cross-talk between the responses induced by H<sub>2</sub>O<sub>2</sub> and by long-term Rice black-streaked dwarf virus infection in rice. *PLoS ONE* 8:e81640.

Yang, Y-X., Ahammed, G., Wu, C., Fan, S., Zhou, Y-H. (2015). Crosstalk among jasmonate, salicylate and ethylene signaling pathways in plant disease and immune responses. *Curr Protein Pept Sci Internet* 16:450–461.

Yang, Y., Xue, W., Chen, P., Yuan, X., Li, X., Zhang, T., Chen, S. (2021). Identification and expression analyzes of CC-type glutaredoxin in cucumber (*Cucumis sativus* L.) under abiotic stress. *Scientia Horticulturae*, 289:110417.

Yang, Y., Zhang, X., Zhang, L., Chen, S (2022). CC-type glutaredoxin gene CsGRX4 in cucumber responds to *Botrytis cinerea* via JA signaling pathway. *Scientia Horticulturae*. 306;111440.

Yuan, H.M., Liu, W.C., Lu, Y.T. (2017). CATALASE2 coordinates SA-mediated repression of both auxin accumulation and JA biosynthesis in plant defenses. *Cell Host Microb.* 21:143–155.

Zaffagnini, M., Bedhomme, M., Marchand, C. H., Couturier, J. R., Gao, X. H., Rouhier, N., Trost, P. and Lemaire, S. D. (2012). Glutaredoxin S12: unique properties for redox signaling. *Antioxid. Redox Signaling*. 16: 17–32.

Zaffagnini, M., Michelet, L., Massot, V., Trost, P., and Lemaire, S.D. (2008). Biochemical characterization of glutaredoxins from *Chlamydomonas reinhardtii* reveals the unique properties of a chloroplastic CGFS-type glutaredoxin. *J Biol Chem*. 283: 8868–8876.

CcGRXS12 protects plants from biotic and abiotic stresses

Zander, M., Chen, S., Imkampe, J., Thurow, C., Gatz, C. (2012). Repression of the *Arabidopsis thaliana* jasmonic acid/ethylene induced defense pathway by TGA-interacting glutaredoxins depends on their C-terminal ALWL motif. *Mol. Plant*, 2012, 5, 831–840.

Zhang, X., Mou, Z. (2009). Extracellular pyridine nucleotides induce PR gene expression and disease resistance in *Arabidopsis*. *Plant J.* 57: 302-12.

Zhao, W., Zhou, Y., Zhou, X., Wang, X., Ji, Y. (2021). Host GRXC6 restricts Tomato yellow leaf curl virus infection by inhibiting the nuclear export of the V2 protein. *PLoS Pathog.* 16;17(8):e1009844.

Zhao, Y., Liu, M., He, L., Li, X., Wang, F., Yan, B., Wei, J., Zhao, C., Li, Z., Xu, J. (2019). A cytosolic NAD<sup>+</sup>-dependent GPDH from maize (*ZmGPDH1*) is involved in conferring salt and osmotic stress tolerance. *BMC Plant Biol* 19, 16.
